# Supplementary material for: Regional Interaction Frameworks to Support Multi-Hazard Approaches to Disaster Risk Reduction (With an Application to Guatemala)
Source: Copernicus journal article supplement (doi:10.5194/nhess-2018-363), 2018-12-07
Supplement: Supplementary file 1 [file nhess-2018-363-supplement.pdf]

# Regional Interaction Frameworks to Support Multi-Hazard Approaches to Disaster Risk Reduction (With an Application to Guatemala)

## -- Supplementary Material --

Joel C. Gill (British Geological Survey, Keyworth, UK. Corresponding Author: [joell@bgs.ac.uk](mailto:joell@bgs.ac.uk))

Bruce D. Malamud (Department of Geography, King's College London, UK)

Edy Manolo Barillas (UN-OCHA, Guatemala City, Guatemala)

Alex Guerra Noriega (Instituto Privado de Investigación sobre Cambio Climático, Guatemala City, Guatemala)

### S1. Workshops Methodology and Analysis – Additional Information

During our workshop, participants independently completed two tasks.

- Task 1. *Network Linkage Diagram for 21 Hazards (16 participants)*. Participants used this to record triggering relationships that they believed to be relevant to Guatemala. We did not expect any participant to map out all relevant interactions. In **Figure S1**, we show 16 network linkage diagrams, each completed by a different workshop participant. Completed network linkage diagrams vary in the number and range of interactions proposed to be relevant in Guatemala. The number of interactions proposed by any one participant ranged from 8 to 35, with a mean of 18 and a median (50<sup>th</sup> percentile) of 15.
- Task 2. *7 × 11 Hazard Interaction Matrix (15 participants)*. Participants completed a blank hazard interaction matrix, with seven primary hazards on the vertical axis and eleven secondary hazards on the horizontal axis. In our second task, 15 participants completed a *7 × 11 Hazard Interaction Matrix*, with seven primary hazards on the vertical axis and eleven secondary hazards on the horizontal axis. Participants noted both relevant *triggering* and *increased probability* interactions in Guatemala. Completed matrices again show variation in the number and range of proposed interactions. In **Figure S2**, we show 15 hazard matrices, each completed by a different participant. The number of *triggering* interactions proposed by any one participant ranged from 3 to 36, with a mean of 12 and median (50<sup>th</sup> percentile) of 7. The number of *increased probability* interactions proposed by any one participant ranged from 0 to 29, with a mean of 9 and median (50<sup>th</sup> percentile) of 6. Using all 15 matrices, we develop a representation of the combined knowledge of participants.

We therefore collected two sets of visual records that document participants' perceptions of relevant hazard interactions in Guatemala. Using the results of these tasks we can represent the combined knowledge of the workshop participants. These are presented on pages \*\* to \*\* of this supplementary material.

**Figures S1-16. Stakeholder identification (using network linkage diagram for 21 hazards) of possible hazard interactions in Guatemala.** 16 network linkage diagrams, completed by hazard and civil protection professionals at CONRED (during a 3-hour workshop in Guatemala on 6 March 2014.

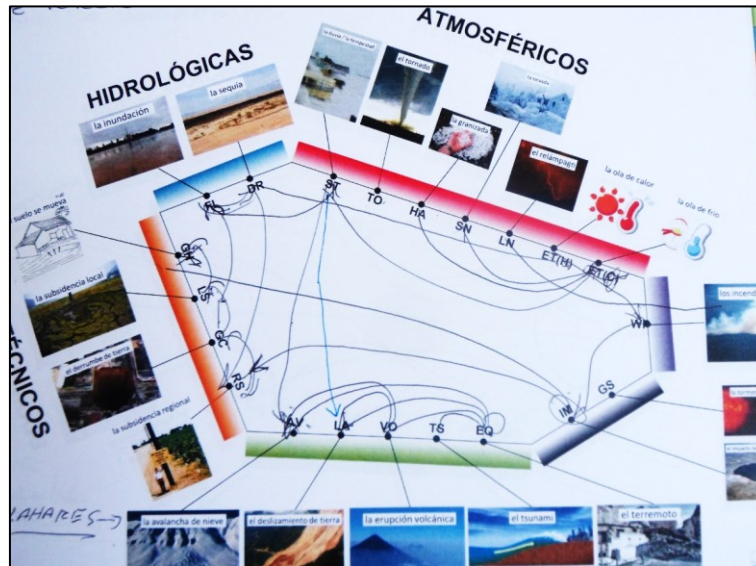

**Figure S1.** Network linkage diagram for 21 hazards.

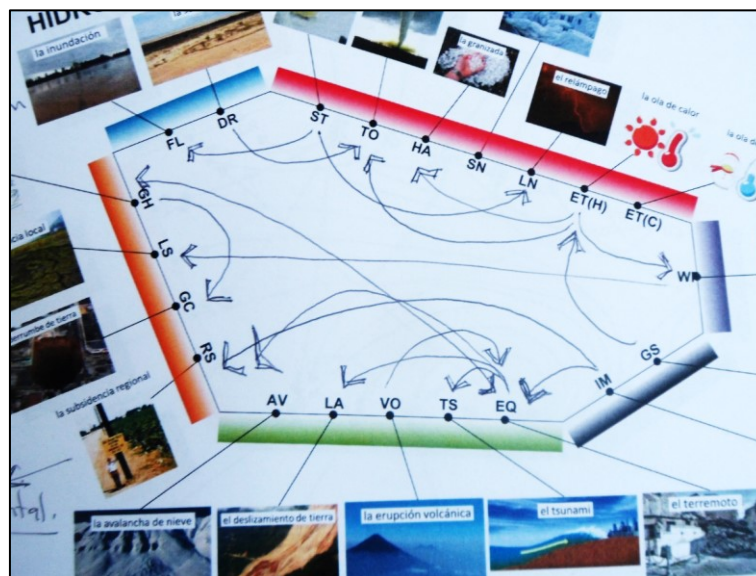

**Figure S2.** Network linkage diagram for 21 hazards.

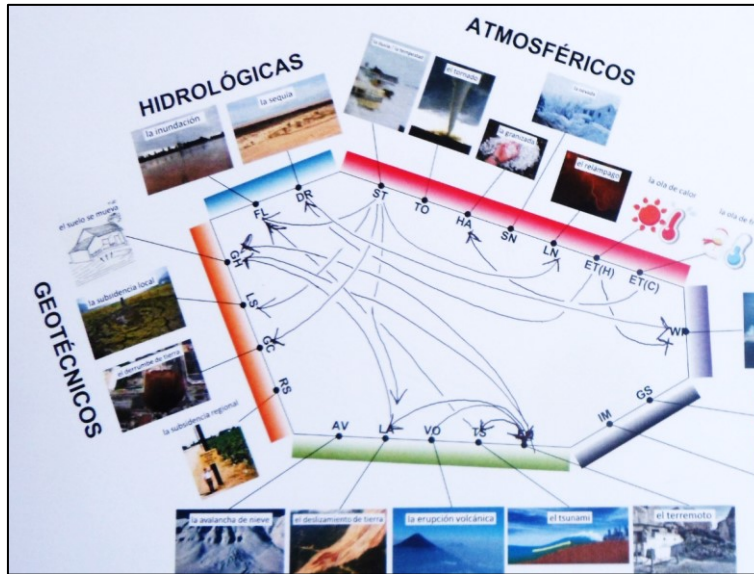

Figure S3. Network linkage diagram for 21 hazards.

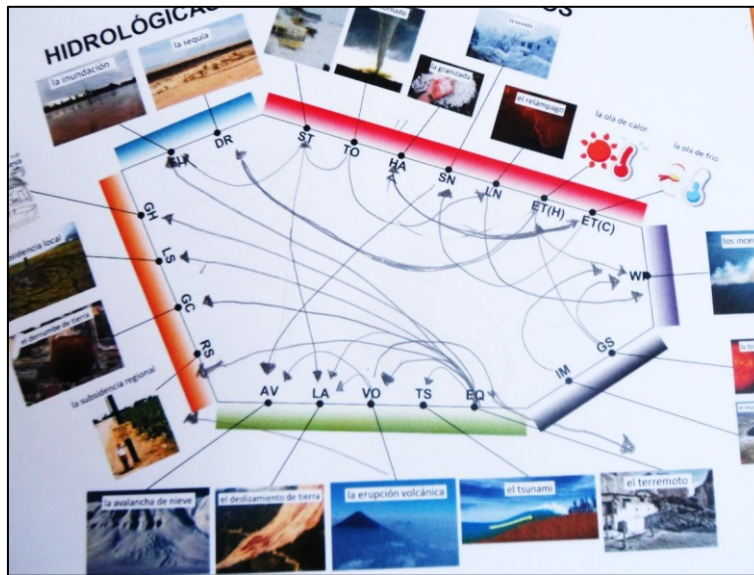

Figure S4. Network linkage diagram for 21 hazards.

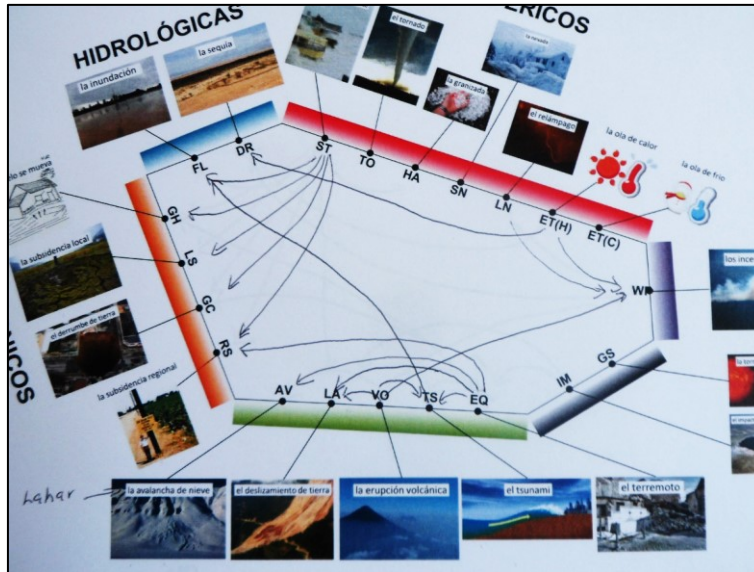

Figure S5. Network linkage diagram for 21 hazards.

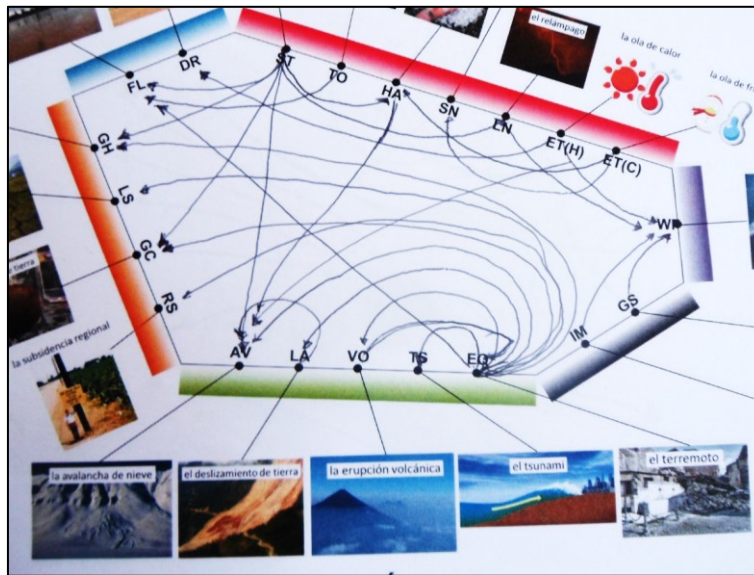

Figure S6. Network linkage diagram for 21 hazards.



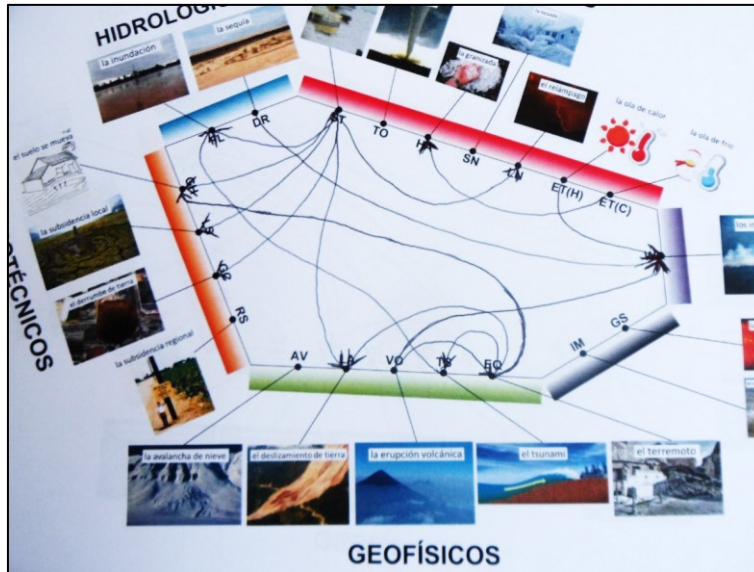

Figure S7. Network linkage diagram for 21 hazards.

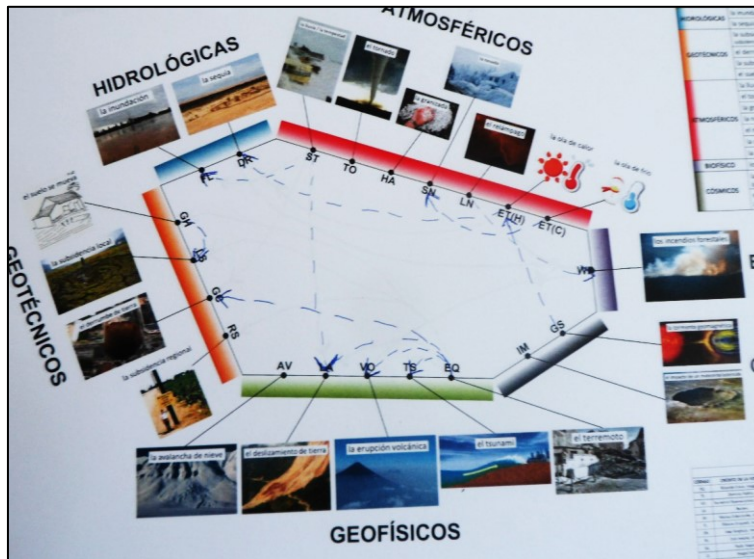

Figure S8. Network linkage diagram for 21 hazards.

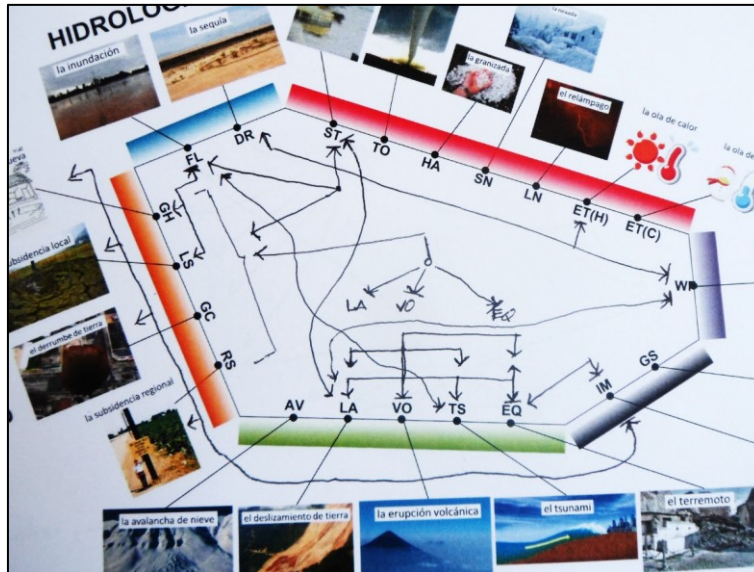

Figure S9. Network linkage diagram for 21 hazards.

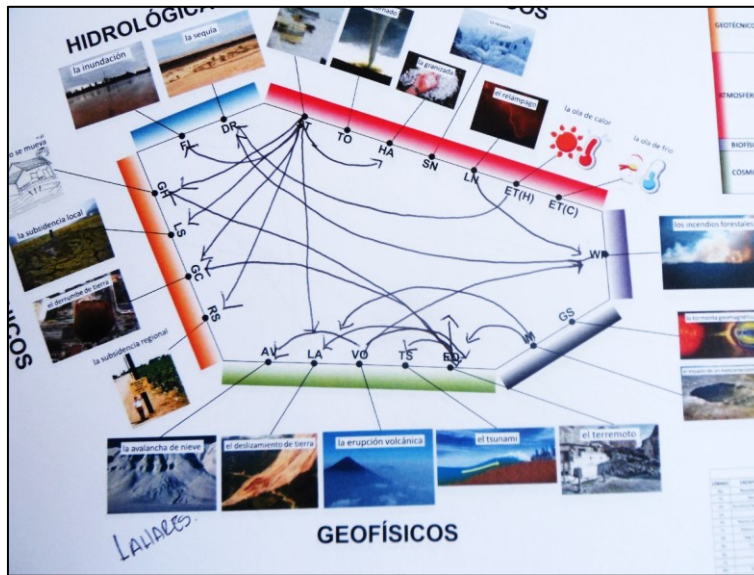

Figure S10. Network linkage diagram for 21 hazards.

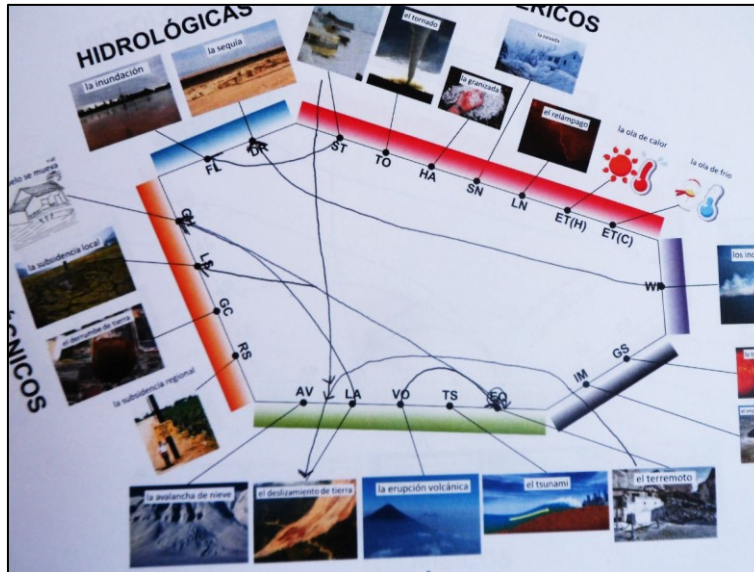

Figure S11. Network linkage diagram for 21 hazards.

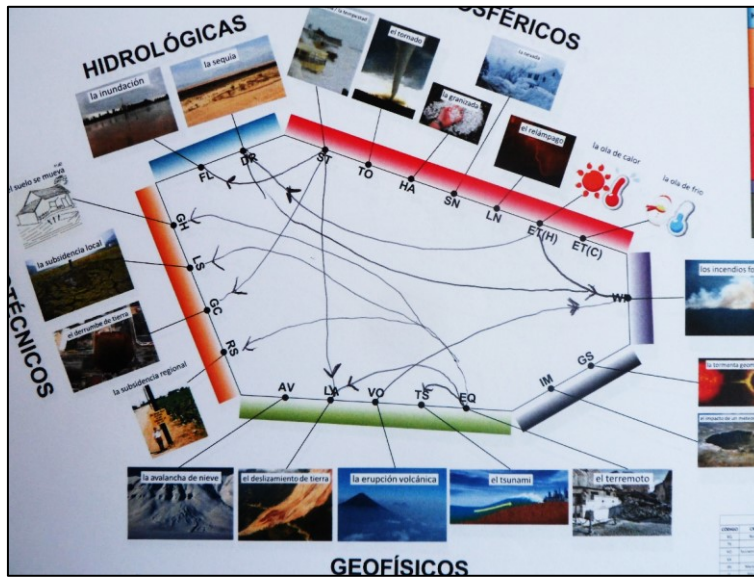

Figure S12. Network linkage diagram for 21 hazards.



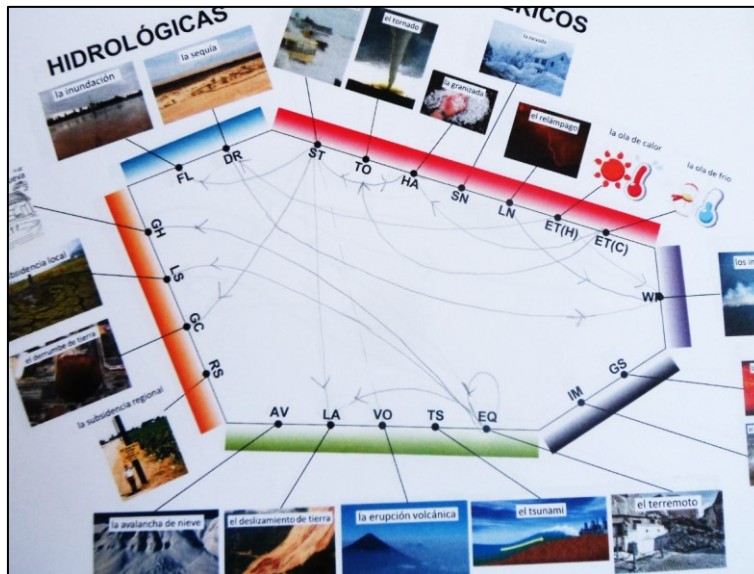

**Figure S13** Network linkage diagram for 21 hazards.

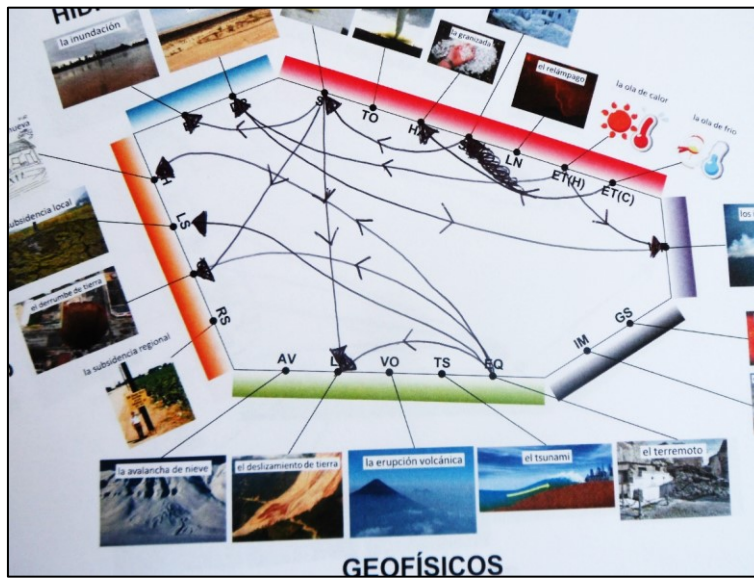

**Figure S14.** Network linkage diagram for 21 hazards.



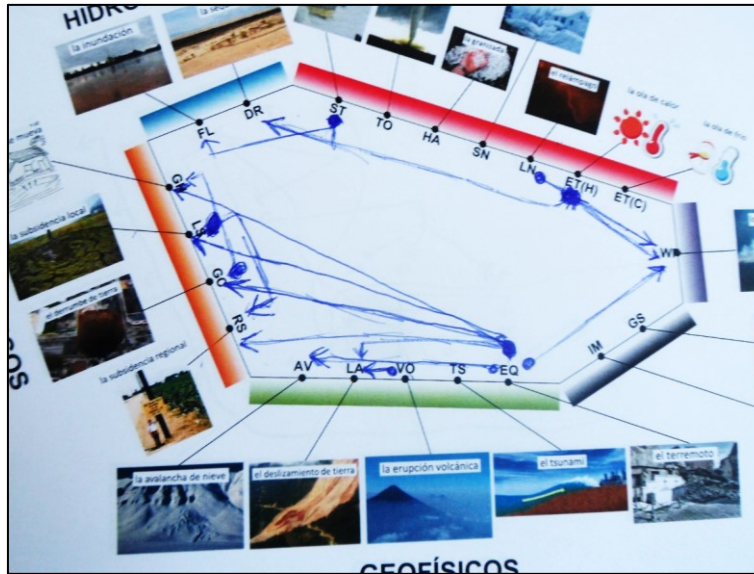

Figure S15. Network linkage diagram for 21 hazards.

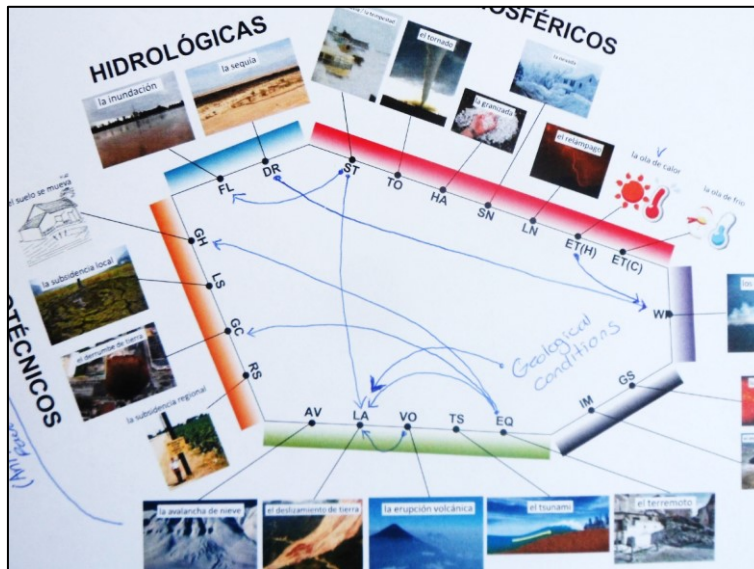

Figure S16. Network linkage diagram for 21 hazards.

**Figures S17-31. Stakeholder identification (using 7×11 hazard interaction matrix) of possible hazard interactions in Guatemala.** 15 network linkage diagrams, completed by hazard and civil protection professionals at CONRED during a 3-hour workshop in Guatemala on 6 March 2014.

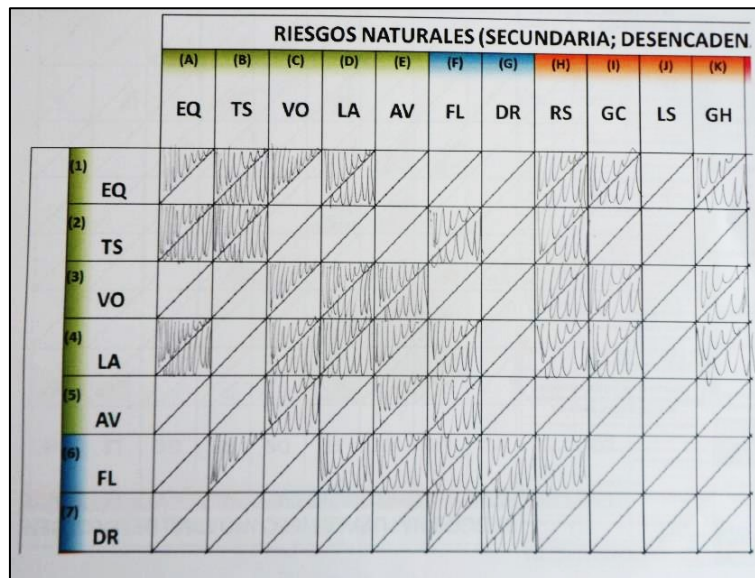

**Figure S17.** 7×11 hazard interaction matrix.

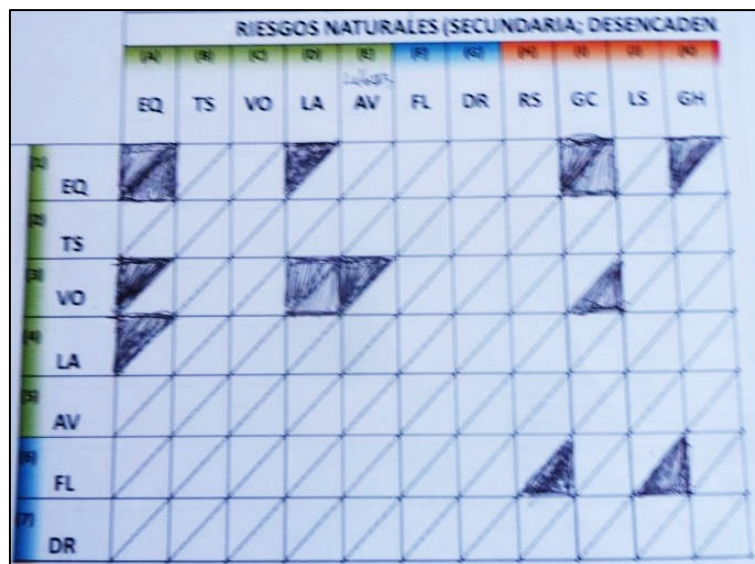

**Figure S18.** 7×11 hazard interaction matrix.

|     | (A) | (B) | (C) | (D) | (E) | (F) | (G) | (H) | (I) | (J) | (K) |
|-----|-----|-----|-----|-----|-----|-----|-----|-----|-----|-----|-----|
|     | EQ  | TS  | VO  | LA  | AV  | FL  | DR  | RS  | GC  | LS  | GH  |
| (1) | EQ  |     |     |     |     |     |     |     |     |     |     |
| (2) | TS  |     |     |     |     |     |     |     |     |     |     |
| (3) | VO  |     |     |     |     |     |     |     |     |     |     |
| (4) | LA  |     |     |     |     |     |     |     |     |     |     |
| (5) | AV  |     |     |     |     |     |     |     |     |     |     |
| (6) | FL  |     |     |     |     |     |     |     |     |     |     |
| (7) | DR  |     |     |     |     |     |     |     |     |     |     |

Figure S19. 7×11 hazard interaction matrix.

|     |    | RIESGOS NATURALES (SECUNDARIA; DESENCADEN) |     |     |     |     |     |     |     |     |     |     |
|-----|----|--------------------------------------------|-----|-----|-----|-----|-----|-----|-----|-----|-----|-----|
|     |    | (A)                                        | (B) | (C) | (D) | (E) | (F) | (G) | (H) | (I) | (J) | (K) |
|     |    | EQ                                         | TS  | VO  | LA  | AV  | FL  | DR  | RS  | GC  | LS  | GH  |
| (1) | EQ |                                            |     |     |     |     |     |     |     |     |     |     |
| (2) | TS |                                            |     |     |     |     |     |     |     |     |     |     |
| (3) | VO |                                            |     |     |     |     |     |     |     |     |     |     |
| (4) | LA |                                            |     |     |     |     |     |     |     |     |     |     |
| (5) | AV |                                            |     |     |     |     |     |     |     |     |     |     |
| (6) | FL |                                            |     |     |     |     |     |     |     |     |     |     |
| (7) | DR |                                            |     |     |     |     |     |     |     |     |     |     |

Figure S20. 7×11 hazard interaction matrix.



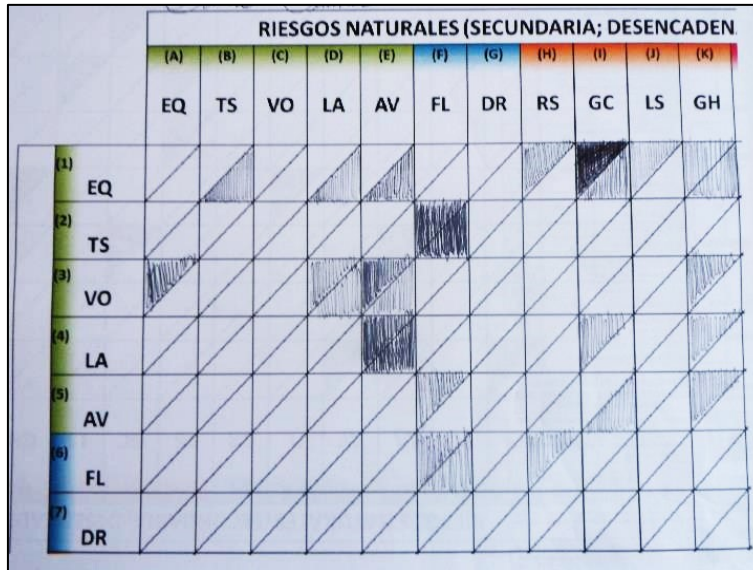

Figure S21. 7×11 hazard interaction matrix.

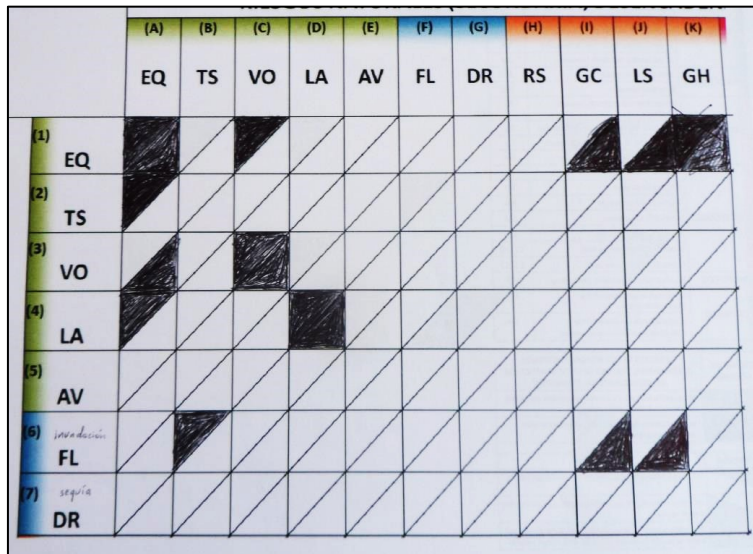

Figure S22. 7×11 hazard interaction matrix.

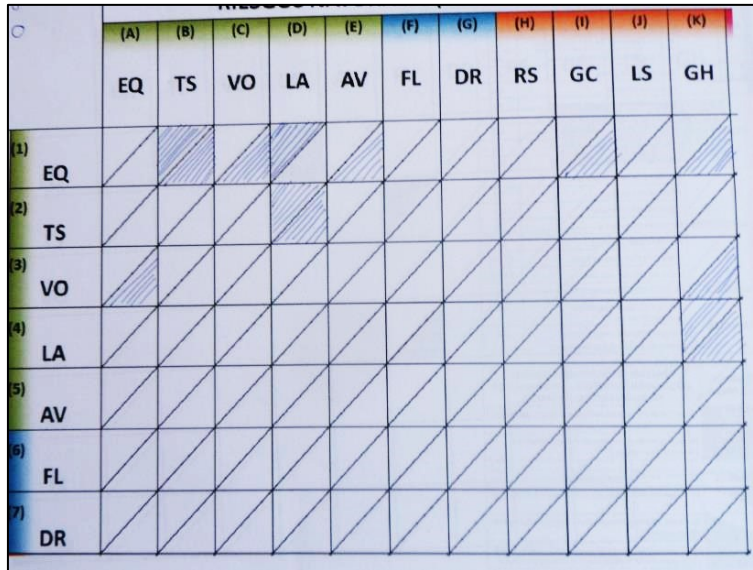

Figure S23. 7x11 hazard interaction matrix.

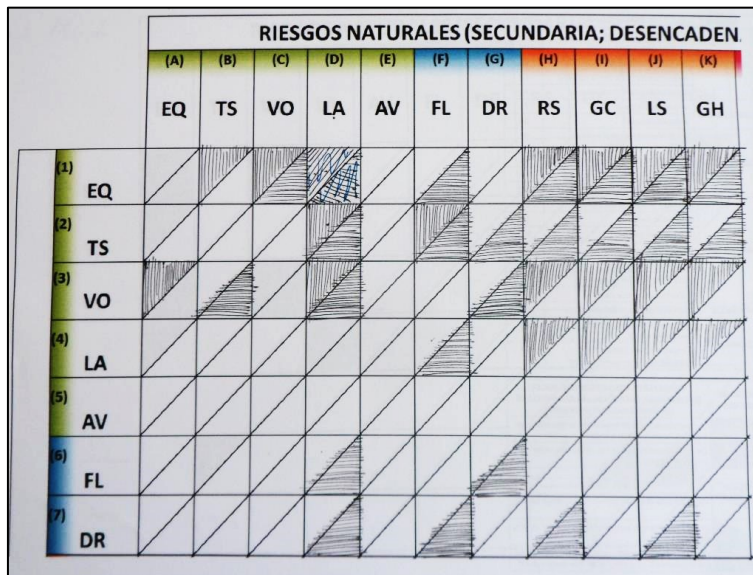

Figure S24. 7x11 hazard interaction matrix.

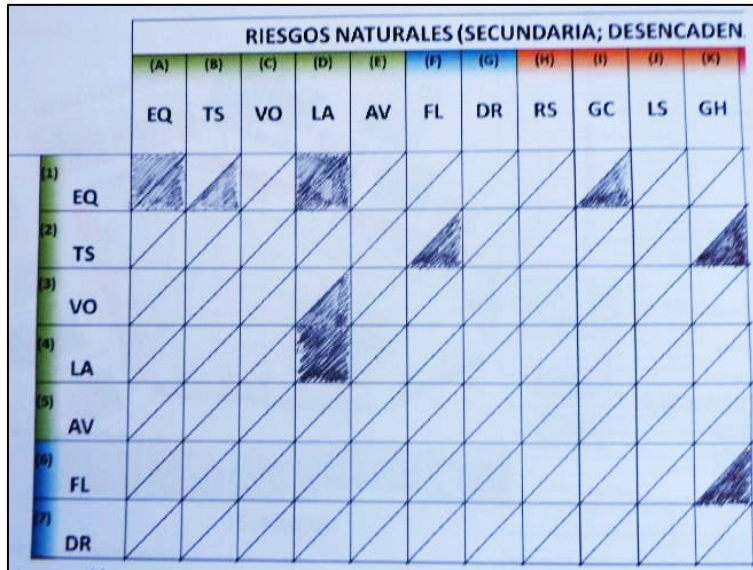

Figure S25. 7×11 hazard interaction matrix.

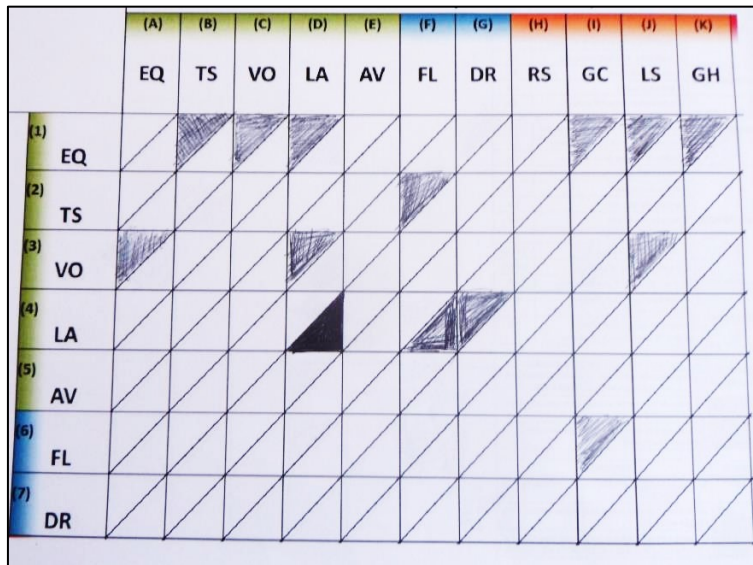

Figure S26. 7×11 hazard interaction matrix.



|     |    | RIESGOS NATURALES (SECUNDARIA; DESENCADEN) |     |     |     |     |     |     |     |     |     |     |
|-----|----|--------------------------------------------|-----|-----|-----|-----|-----|-----|-----|-----|-----|-----|
|     |    | (A)                                        | (B) | (C) | (D) | (E) | (F) | (G) | (H) | (I) | (J) | (K) |
|     |    | EQ                                         | TS  | VO  | LA  | AV  | FL  | DR  | RS  | GC  | LS  | GH  |
| (1) | EQ |                                            |     |     |     |     |     |     |     |     |     |     |
| (2) | TS |                                            |     |     |     |     |     |     |     |     |     |     |
| (3) | VO |                                            |     |     |     |     |     |     |     |     |     |     |
| (4) | LA |                                            |     |     |     |     |     |     |     |     |     |     |
| (5) | AV |                                            |     |     |     |     |     |     |     |     |     |     |
| (6) | FL |                                            |     |     |     |     |     |     |     |     |     |     |
| (7) | DR |                                            |     |     |     |     |     |     |     |     |     |     |

Figure S27. 7×11 hazard interaction matrix.

|     |    | RIESGOS NATURALES (SECUNDARIA; DESENCADEN) |     |     |     |     |     |     |     |     |     |     |
|-----|----|--------------------------------------------|-----|-----|-----|-----|-----|-----|-----|-----|-----|-----|
|     |    | (A)                                        | (B) | (C) | (D) | (E) | (F) | (G) | (H) | (I) | (J) | (K) |
|     |    | EQ                                         | TS  | VO  | LA  | AV  | FL  | DR  | RS  | GC  | LS  | GH  |
| (1) | EQ |                                            |     |     |     |     |     |     |     |     |     |     |
| (2) | TS |                                            |     |     |     |     |     |     |     |     |     |     |
| (3) | VO |                                            |     |     |     |     |     |     |     |     |     |     |
| (4) | LA |                                            |     |     |     |     |     |     |     |     |     |     |
| (5) | AV |                                            |     |     |     |     |     |     |     |     |     |     |
| (6) | FL |                                            |     |     |     |     |     |     |     |     |     |     |
| (7) | DR |                                            |     |     |     |     |     |     |     |     |     |     |

Figure S28. 7×11 hazard interaction matrix.

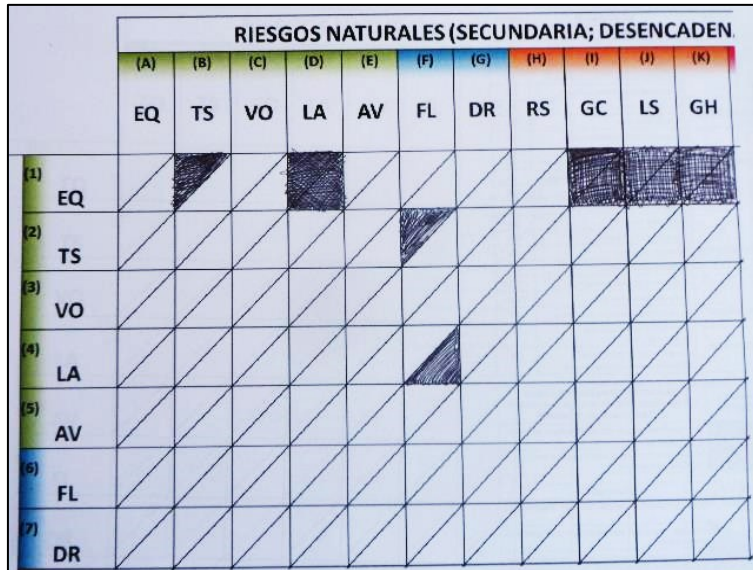

Figure S29. 7×11 hazard interaction matrix.

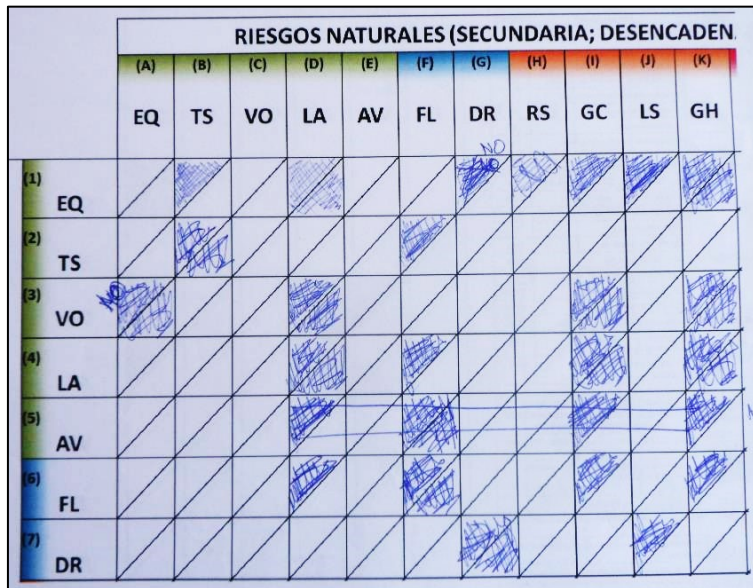

Figure S30. 7×11 hazard interaction matrix.

|     |    | RIESGOS NATURALES (SECUNDARIA; DESENCADEN) |     |     |     |     |     |     |     |     |     |     |
|-----|----|--------------------------------------------|-----|-----|-----|-----|-----|-----|-----|-----|-----|-----|
|     |    | (A)                                        | (B) | (C) | (D) | (E) | (F) | (G) | (H) | (I) | (J) | (K) |
|     |    | EQ                                         | TS  | VO  | LA  | AV  | FL  | DR  | RS  | GC  | LS  | GH  |
| (1) | EQ |                                            | ■   |     | ■   |     |     |     | ■   | ■   | ■   | ■   |
| (2) | TS |                                            |     |     |     |     | ■   |     |     |     |     |     |
| (3) | VO |                                            |     |     | ■   |     |     |     |     |     |     |     |
| (4) | LA |                                            |     |     |     |     |     |     |     |     |     |     |
| (5) | AV |                                            |     |     |     |     |     |     |     |     |     |     |
| (6) | FL |                                            |     |     |     |     |     |     |     |     |     |     |
| (7) | DR |                                            |     |     |     |     |     |     |     |     |     |     |

Figure S31. 7×11 hazard interaction matrix.



## Task 1: Network Linkage Diagram for 21 Hazards

In **Figure S32**, we overlay evidence from 16 completed network linkage diagrams on a *global* interaction framework. Grey shading indicates those interactions included in the *global* interaction framework, not all of which are relevant in Guatemala. **Figure S32**, shows the number of participants (out of 16) proposing each triggering relationship.

|                |             | SECONDARY HAZARD (TRIGGERED) |        |        |        |        |        |        |        |        |        |        |        |        |        |        |        |            |            |        |        |        |
|----------------|-------------|------------------------------|--------|--------|--------|--------|--------|--------|--------|--------|--------|--------|--------|--------|--------|--------|--------|------------|------------|--------|--------|--------|
|                |             | (A) EQ                       | (B) TS | (C) VO | (D) LA | (E) AV | (F) FL | (G) DR | (H) RS | (I) GC | (J) SS | (K) GH | (L) ST | (M) TO | (N) HA | (O) SN | (P) LN | (Q) ET (H) | (R) ET (C) | (S) WF | (T) GS | (U) IM |
| PRIMARY HAZARD | (1) EQ      | 5                            | 11     | 4      | 16     | 2      | 2      |        | 7      | 8      | 8      | 13     | 1      |        |        |        |        |            |            |        |        | 1      |
|                | (2) TS      |                              |        |        |        |        | 4      |        |        |        |        |        |        |        |        |        |        |            |            |        |        |        |
|                | (3) VO      | 8                            | 2      |        | 7      | 1      |        |        | 2      | 1      | 1      | 1      |        |        |        |        |        |            |            |        | 4      |        |
|                | (4) LA      |                              |        |        | 1      |        |        |        | 1      | 1      | 1      | 3      |        |        |        |        |        |            |            |        |        |        |
|                | (5) AV      |                              |        |        |        |        |        |        |        |        |        |        |        |        |        |        |        |            |            |        |        |        |
|                | (6) FL      |                              |        |        |        |        |        | 1      |        |        | 1      | 1      |        |        |        |        |        |            |            |        |        |        |
|                | (7) DR      |                              |        |        |        |        |        | 1      | 1      |        |        |        |        | 1      |        |        |        |            |            |        | 5      |        |
|                | (8) RS      |                              |        |        |        |        |        |        |        | 1      | 1      | 1      |        |        |        |        |        |            |            |        |        |        |
|                | (9) GC      |                              |        |        |        |        |        | 1      | 1      |        | 1      | 2      |        |        |        |        |        |            |            |        |        |        |
|                | (10) SS     |                              |        |        |        |        |        |        | 2      | 1      |        | 1      |        |        |        |        |        |            |            |        | 1      |        |
|                | (11) GH     | 2                            |        |        |        |        |        |        | 1      | 2      | 2      |        |        |        |        |        |        |            |            |        |        |        |
|                | (12) ST     |                              |        |        | 12     | 1      | 16     |        | 3      | 9      | 5      | 5      |        |        |        | 3      |        | 4          |            |        |        |        |
|                | (13) TO     |                              |        |        |        |        | 1      |        |        |        |        |        |        | 1      |        |        |        | 1          |            |        |        |        |
|                | (14) HA     |                              |        |        | 1      |        |        |        |        |        |        |        |        | 1      |        |        |        |            |            |        |        |        |
|                | (15) SN     |                              |        |        | 1      |        |        |        |        |        |        |        |        | 1      |        |        |        |            |            |        |        |        |
|                | (16) LN     |                              |        |        |        |        |        |        |        |        |        |        |        |        |        |        |        |            |            |        | 8      |        |
|                | (17) ET (H) |                              |        |        |        |        |        | 12     |        |        |        |        |        | 1      | 1      |        |        |            |            |        | 11     |        |
|                | (18) ET (C) |                              |        |        |        | 1      |        |        |        |        |        |        |        | 1      | 1      | 6      | 4      |            |            |        |        |        |
|                | (19) WF     |                              |        |        | 1      |        |        | 3      |        |        |        |        |        |        |        |        |        |            |            |        |        |        |
|                | (20) GS     |                              |        |        |        |        |        |        |        |        |        |        |        |        |        |        |        |            | 3          |        | 2      |        |
|                | (21) IM     | 3                            |        |        | 1      |        |        |        | 3      | 1      | 1      | 2      |        |        |        |        |        |            |            |        |        | 3      |

  

| KEY                     |                            |        |
|-------------------------|----------------------------|--------|
| HAZARD GROUP            | HAZARD                     | CODE   |
| GEOPHYSICAL             | Earthquake                 | EQ     |
|                         | Tsunami                    | TS     |
|                         | Volcanic Eruption          | VO     |
|                         | Landslide                  | LA     |
|                         | Snow Avalanche             | AV     |
| HYDROLOGICAL            | Flood                      | FL     |
|                         | Drought                    | DR     |
| SHALLOW EARTH PROCESSES | Regional Subsidence        | RS     |
|                         | Ground Collapse            | GC     |
|                         | Soil (Local) Subsidence    | SS     |
|                         | Ground Heave               | GH     |
|                         | Storm                      | ST     |
| ATMOSPHERIC             | Tornado                    | TO     |
|                         | Hailstorm                  | HA     |
|                         | Snowstorm                  | SN     |
|                         | Lightning                  | LN     |
|                         | Extreme Temperature (Hot)  | ET (H) |
|                         | Extreme Temperature (Cold) | ET (C) |
| BIOPHYSICAL             | Wildfire                   | WF     |
| SPACE                   | Geomagnetic Storm          | GS     |
|                         | Impact Event               | IM     |

  

| SYMBOL | EXPLANATION                                                                                                             |
|--------|-------------------------------------------------------------------------------------------------------------------------|
|        | Global Interaction Framework Indicates Hazard <b>Triggers</b> Secondary Hazard ( <i>not all relevant in Guatemala</i> ) |
| 12     | 12                                                                                                                      |
|        | Number of Workshop Participants (n = 16) Identifying Interactions as Relevant in Guatemala                              |

**Figure S32. Stakeholder identification (using the network linkage diagrams presented in Figures S1-16 and transferred to the above matrix) of possible hazard interactions in Guatemala.** A  $21 \times 21$  matrix with primary hazards on the vertical axis and secondary hazards on the horizontal axis. These hazards are coded, as explained in the key. These matrices show cases where a primary hazard could trigger a secondary hazard. Grey cell shading indicates the triggering interactions in the global hazard interaction matrix of Gill and Malamud (2014). Numbers indicate the total number (from a maximum of 16) of stakeholders proposing each hazard interaction as being possible in Guatemala.

Of a total possible 441 ( $21 \times 21$ ) interactions, there are 86 different interactions proposed in **Figure S32** as being relevant in Guatemala (by 1–16 participants), equivalent to 20% of the 441 possible interactions. Consequently, 355 interactions (80% of the 441 possible interactions) were determined by all 16 participants as not relevant in Guatemala. Of the 86 hazard interactions proposed by  $\geq 1$  participant:

- i. Two (2%) were proposed by all 16 participants (100% of the group). These were *earthquake*  $\rightarrow$  *landslide*, and *storm*  $\rightarrow$  *flood*.

- ii. Three (3%) were proposed by  $\geq 13$  participants ( $\geq 75\%$  of the group). These were *earthquake*  $\rightarrow$  *landslide*, *earthquake*  $\rightarrow$  *ground heave*, and *storm*  $\rightarrow$  *flood*.
- iii. Eight (9%) were proposed by  $\geq 9$  participants ( $\geq 50\%$  of the group). These were *earthquake*  $\rightarrow$  *landslide*, *earthquake*  $\rightarrow$  *ground heave*, *storm*  $\rightarrow$  *flood*, *earthquake*  $\rightarrow$  *tsunami*, *storm*  $\rightarrow$  *landslide*, *storm*  $\rightarrow$  *ground collapse*, *extreme temperatures*  $\rightarrow$  *drought*, and *extreme temperatures*  $\rightarrow$  *wildfire*.
- iv. Nineteen (22%) were proposed by  $\geq 5$  participants ( $\geq 25\%$  of the group). Additional examples to those noted above include *drought*  $\rightarrow$  *wildfire*, *earthquake*  $\rightarrow$  *regional subsidence*, and *lightning*  $\rightarrow$  *wildfire*.
- v. The remaining 67 (78%) were proposed by 1–4 participants. Examples include *volcanic eruption*  $\rightarrow$  *tsunami*, *snowstorm*  $\rightarrow$  *avalanche*, and *impact event*  $\rightarrow$  *landslide*.

There is strong agreement between participants on ‘no interaction occurs’ (355 of 441 possible interactions), but much greater variation in agreement on ‘interaction occurs’ (86 of 441 possible interactions). Some of the proposed interactions may not be relevant (false positives), and others not proposed by participants may be relevant (false negatives) in Guatemala.

### Task 2: 7 × 11 Hazard Interaction Matrix

In **Figure S33**, we overlay the 15 completed matrices in **Figures S17-31** on a 7×11 section of a *global* interaction framework. Grey shading indicates interactions (triggering or increased probability) included in the *global* interaction framework, not all of which are relevant in Guatemala.

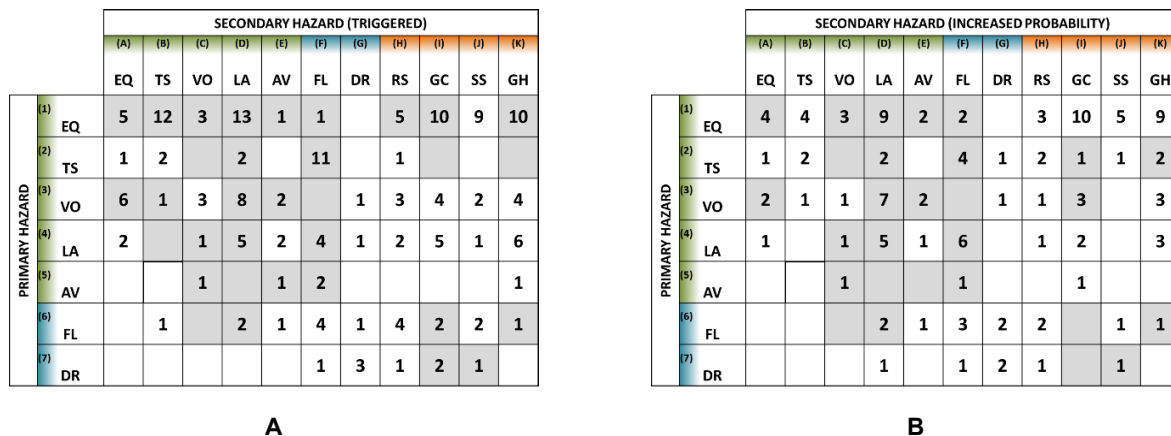

**Figure S33. Stakeholder identification (using interaction matrix) of possible hazard triggering and increased probability interactions in Guatemala.** Two 7 × 11 matrices with primary hazards on the vertical axis and secondary hazards on the horizontal axis. Codes are used for each hazard type as outlined in **Figure S32**, with colour coding for different hazard groups also outlined in **Figure S32**. Grey cell shading indicates a triggering interaction (A) or increased probability interaction (B) existed in the global hazard interaction matrix presented in Gill and Malamud (2014). Each matrix is then used to represent the total number of stakeholders proposing each hazard interaction as being possible in Guatemala (from **Figures S17-31**).

Here we show the number of participants (from 15) proposing each *triggering* relationship (**Figure S33A**) and each *increased probability* relationship (**Figure S33B**). Of a total possible 77 ( $7 \times 11$ ) *triggering* relationships, 53 different *triggering* relationships (69% of the 77 possible interactions) were proposed to be relevant in Guatemala by  $\geq 1$  participant. Consequently, all participants determined that 24 *triggering* relationships (32% of the 77 possible interactions) are not relevant in Guatemala. Of the 53 *triggering* interactions proposed by  $\geq 1$  participant in **Figure S33A**:

- i. None were proposed as being relevant by all 15 participants.
- ii. One (2%) interaction (*earthquake*  $\rightarrow$  *landslide*) was proposed by  $\geq 13$  participants ( $\geq 87\%$  of the group).
- iii. Six (11%) were proposed by  $\geq 9$  participants ( $\geq 60\%$  of the group). Examples include *earthquake*  $\rightarrow$  *tsunami*, *tsunami*  $\rightarrow$  *flood*, and *earthquake*  $\rightarrow$  *ground heave*.
- iv. 13 (25%) were proposed by  $\geq 5$  participants ( $\geq 33\%$  of the group). Additional examples to those noted above include *earthquake*  $\rightarrow$  *regional subsidence*, *volcanic eruption*  $\rightarrow$  *landslide*, and *landslide*  $\rightarrow$  *ground heave*.
- v. The remaining 40 (75%) were proposed by 1–4 participants. Examples include *earthquake*  $\rightarrow$  *volcanic eruption*, *landslide*  $\rightarrow$  *flood*, and *drought*  $\rightarrow$  *ground collapse*.

Of a possible 77 ( $7 \times 11$ ) *increased probability* relationships there were 51 different *increased probability* relationships (66% of the 77 possible interactions) proposed as being relevant in Guatemala by  $\geq 1$  participants. Consequently, all participants determined that 26 *increased probability* relationships (34% of the 77 possible interactions) are not relevant in Guatemala. Of the 51 *increased probability* interactions proposed by  $\geq 1$  participant in **Figure S33B**:

- i. None were proposed by  $\geq 13$  participants ( $\geq 87\%$  of the group).
- ii. Three (6%) were proposed by  $\geq 9$  participants ( $\geq 60\%$  of the group). These were *earthquake*  $\rightarrow$  *landslide*, *earthquake*  $\rightarrow$  *ground collapse*, and *earthquake*  $\rightarrow$  *ground heave*.
- iii. Seven (14%) were proposed by  $\geq 5$  participants ( $\geq 33\%$  of the group). Additional examples to those noted above include *earthquake*  $\rightarrow$  *soil (local) subsidence*, *volcanic eruption*  $\rightarrow$  *landslide*, *landslide*  $\rightarrow$  *landslide*, and *landslide*  $\rightarrow$  *flood*.
- iv. 44 (86%) were proposed by 1–4 participants. Examples include *earthquake*  $\rightarrow$  *volcanic eruption*, *flood*  $\rightarrow$  *landslide*, and *drought*  $\rightarrow$  *soil (local) subsidence*.

Some of the proposed interactions may not be relevant (false positives), and others not proposed by participants may be relevant (false negatives) in Guatemala.



**Table S1. Summary of the CONRED information bulletins.** A description of the civil protection information bulletins issued by CONRED between 11 June 2010 and 15 October 2010 (127 days).

|                                                                               |                                                                        |
|-------------------------------------------------------------------------------|------------------------------------------------------------------------|
| Source                                                                        | CONRED ( <i>Coordinadora Nacional para la Reducción de Desastres</i> ) |
| Title                                                                         | Boletines Informativos (Information Bulletin)                          |
| File Format                                                                   | PDF                                                                    |
| File Language                                                                 | Spanish                                                                |
| Date Range                                                                    | 11/06/2010 to 15/10/2010 (127 days)                                    |
| Number of Published Bulletins in Given Date Range                             | 413                                                                    |
| Number of Bulletins Received                                                  | 291 (70%) of 413                                                       |
| Number of Bulletins Received and Usable                                       | 267 (92%) of 291                                                       |
| <ul style="list-style-type: none"> <li>• Number of Corrupted Files</li> </ul> | 24 (8%) of 291                                                         |
| Number of Bulletins Received and Usable from Total Possible                   | 267 (65%) of 413                                                       |

**Table S2. Keyword search results (after contextual processing) on civil protection information bulletins.** Interactions identified from a keyword search on civil protection bulletins, after removal of irrelevant results.

| Bulletin Details |           |                                                    | Event Details                                                                                                                                                                                                                  | Type      | Hazard Groups         |             |              |               |             |
|------------------|-----------|----------------------------------------------------|--------------------------------------------------------------------------------------------------------------------------------------------------------------------------------------------------------------------------------|-----------|-----------------------|-------------|--------------|---------------|-------------|
| #                | Date      | Location                                           | Description                                                                                                                                                                                                                    | Triggered | Increased Probability | Geophysical | Hydrological | Shallow Earth | Atmospheric |
| 858              | 17-Jun-10 | Lake Amatitlán                                     | A rise in the lake level increased the likelihood of rains <b>causing</b> flooding. Rains can <b>cause</b> flooding due to increased level of lake waters, soil saturation means increased likelihood of landslides/mudslides. |           |                       |             |              |               |             |
| 902              | 29-Jun-10 | South West Guatemala                               | Storm Alex <b>causes</b> floods, landslides/mudslides.                                                                                                                                                                         |           |                       |             |              |               |             |
| 915              | 02-Jul-10 | Atlantic Coast                                     | Rain associated with hurricane <b>causes</b> flooding.                                                                                                                                                                         |           |                       |             |              |               |             |
| 916              |           |                                                    | Storm Alex <b>causes</b> soils to be saturated and increases likelihood of flooding.                                                                                                                                           |           |                       |             |              |               |             |
| 931              | 06-Jul-10 | Agua Volcano, Escuintla                            | Rains <b>cause</b> overflowing of the Michatoya river [flooding], and strong slides [mudslides] down Agua volcano.                                                                                                             |           |                       |             |              |               |             |
| 931              |           | Pacaya, Escuintla                                  | Heavy rains over 2010 rainy season, helped <b>produce</b> floods.                                                                                                                                                              |           |                       |             |              |               |             |
| 933              | 07-Jul-10 | Zone 2, Guatemala City                             | Continued risk from sinkhole/collapse feature. Blockage of water may <b>cause</b> ponding and further erosion at the bottom of a sinkhole/collapse feature. Water can increase erosion and risk of future landslides.          |           |                       |             |              |               |             |
| 950              | 13-Jul-10 | El Cambray II, Santa Catarina Pinula               | Heavy rains <b>cause</b> landslides.                                                                                                                                                                                           |           |                       |             |              |               |             |
| 993              | 28-Jul-10 | --                                                 | Heavy rain <b>caused</b> saturation of soils and has increased risk of landslides and floods.                                                                                                                                  |           |                       |             |              |               |             |
| 1003             | 03-Aug-10 | --                                                 | Weather system <b>causes</b> clouds, showers and lightning.                                                                                                                                                                    |           |                       |             |              |               |             |
| 1006             | 04-Aug-10 | Santiaguito Volcano                                | Degassing in volcanic crater with explosions and ash columns around Santiaguito, <b>caused</b> lahars and erosion, affecting rivers.                                                                                           |           |                       |             |              |               |             |
| 1006             |           | Fuego Volcano                                      | Fuego volcano had weak explosions ejecting ash 200-300 m above crater, and noises 5 km from volcano. <b>Generated</b> a lahar.                                                                                                 |           |                       |             |              |               |             |
| 1013             | 06-Aug-10 | West Guatemala                                     | Rains <b>caused</b> landslides and mass movements, undercutting of slopes.                                                                                                                                                     |           |                       |             |              |               |             |
| 1022             | 10-Aug-10 | Huehuetenango, Solola, Suchitepequez, Sacatepequez | Saturated soils <b>caused</b> landslides.                                                                                                                                                                                      |           |                       |             |              |               |             |
| 1023             |           | Zone 2, Guatemala City                             | Water runoff from drains and river erosion caused leaks and cracking, long process of landslides and finally producing collapse. Leakage from drainage, <b>caused</b> erosion and cracking.                                    |           |                       |             |              |               |             |
| 1043             | 17-Aug-10 | Fuego, Santiaguito, Pacaya Volcanoes               | <b>Generating</b> of lahars in rivers that descend active volcanoes. Take precautions for possibility of scattered ash around volcanoes                                                                                        |           |                       |             |              |               |             |
| 1062             | 23-Aug-10 | Mixco, Guatemala City                              | The collapse of a hillside into a river <b>caused</b> damage, with dredging of the river required.                                                                                                                             |           |                       |             |              |               |             |
| 1069             | 24-Aug-10 | Santiaguito Volcano                                | Volcanic eruption <b>generated</b> rock avalanches. [Explosions and concentration of material in crater, generating constant [rock] avalanches and pyroclastic flows].                                                         |           |                       |             |              |               |             |

| Bulletin Details |           |                                                  | Event Details                                                                                                                                                                                 | Type      | Hazard Groups         |             |              |               |             |
|------------------|-----------|--------------------------------------------------|-----------------------------------------------------------------------------------------------------------------------------------------------------------------------------------------------|-----------|-----------------------|-------------|--------------|---------------|-------------|
| #                | Date      | Location                                         | Description                                                                                                                                                                                   | Triggered | Increased Probability | Geophysical | Hydrological | Shallow Earth | Atmospheric |
| 1072             | 25-Aug-10 | Baja Verapaz, Guatemala City, San Marcos, Zacapa | Heavy rains <b>generate</b> landslides.                                                                                                                                                       |           |                       |             |              |               |             |
| 1076             | 26-Aug-10 | --                                               | Low-pressure system present unstable conditions and <b>generate</b> cloud with drizzle or moderate rains, with some lightning.                                                                |           |                       |             |              |               |             |
| 1078             | 27-Aug-10 | Meseta Central Pacific Regions                   | Weather system <b>generates</b> showers and lightning.                                                                                                                                        |           |                       |             |              |               |             |
| 1078             |           |                                                  | Rain <b>causes</b> soil saturation, which results in landslides, some damaging roads.                                                                                                         |           |                       |             |              |               |             |
| 1079             |           |                                                  | Weather system <b>generates</b> showers and lightning.                                                                                                                                        |           |                       |             |              |               |             |
| 1086             | 30-Aug-10 | --                                               | Strong winds <b>cause</b> rough seas and possible storm surges.                                                                                                                               |           |                       |             |              |               |             |
| 1095             | 02-Sep-10 | --                                               | Increased rainfall has saturated soil and <b>produced</b> 709 landslides, mudslides and floods since late May after Tropical Storm Agatha.                                                    |           |                       |             |              |               |             |
| 1126             | 09-Sep-10 | Quetzaltenango, Chimaltenango, Alta Verapaz      | Rains <b>produced</b> floods, landslides/mudslides.                                                                                                                                           |           |                       |             |              |               |             |
| 1129             |           | San Sebastian, Retalhuleu, Santiaguito           | Santiaguito volcano lahars <b>caused</b> flooding of the Samalá river, causing damage to bridges.                                                                                             |           |                       |             |              |               |             |
| 1134             | 11-Sep-10 | --                                               | Intense rains <b>cause</b> overflowing rivers, saturated soils, which <b>cause</b> floods and mudslides.                                                                                      |           |                       |             |              |               |             |
| 1137             | 12-Sep-10 | Santiaguito Volcano                              | Eruption at Santiaguito, <b>generated</b> two pyroclastic flows that transported material 3 km away                                                                                           |           |                       |             |              |               |             |
| 1165             | 21-Sep-10 | North Guatemala and Caribbean.                   | Humid and warm environment <b>generates</b> electrical activity and rain showers.                                                                                                             |           |                       |             |              |               |             |
| 1174             | 23-Sep-10 | --                                               | Monitoring of rivers during Storm Matthew as it could <b>provoke</b> damage                                                                                                                   |           |                       |             |              |               |             |
| 1175             | 24-Sep-10 | Nicaragua, Honduras                              | Storm winds and rainfall, <b>cause</b> flash floods, landslides and mudslides                                                                                                                 |           |                       |             |              |               |             |
| 1183             | 25-Sep-10 | --                                               | Tropical Storm Matthew <b>produces</b> heavy rains, which <b>causes</b> rivers to rise. Rains <b>cause</b> soil saturation, expected that rivers will exceed water levels and flooding occur. |           |                       |             |              |               |             |
| 1184             |           | Motagua River, Morales, Izabal                   | Tropical Storm Matthew <b>causes</b> heavy rains and Motagua river to increase in volume. Overflow <b>caused</b> a flood.                                                                     |           |                       |             |              |               |             |
| 1185             | --        | --                                               | Saturated soils could <b>cause</b> landslides or mudslides.                                                                                                                                   |           |                       |             |              |               |             |
| 1186             | --        | --                                               | Tropical Storm Matthew <b>causes</b> heavy rains, rising tides and floods.                                                                                                                    |           |                       |             |              |               |             |
| 1199             |           | Centre/South Guatemala                           | Low-pressure system <b>generates</b> clouds, showers and lightning.                                                                                                                           |           |                       |             |              |               |             |
| 1222             | 05-Oct-10 | Ixcán, Quiché, Chixoy River                      | Heavy rains <b>cause</b> river overflow.                                                                                                                                                      |           |                       |             |              |               |             |
| 1227             | 06-Oct-10 | Fuego, Pacaya Santiaguito/                       | Monitoring the <b>generation</b> of lahars on slopes of active volcanoes.                                                                                                                     |           |                       |             |              |               |             |



**Table S3. Description of individual stakeholders in Guatemala.** A summary of 33 interview and workshop participants. Descriptions include their sector/organisation, an identifying code, the process by which they were selected, interview translation styles (1. Translator from KCL. 2. Third-party translator. 3. Translator from same organisation as participant. 4. Interview in Spanish. 5. Interview in English), and the key themes discussed in interviews.

| Sector/<br>Organisation | Code | Interview | Workshop | Selection Process                                                                                                                                                                            | Translation Style (codes in key) | Discussion Themes (Interviews Only) |                                    |                            |                         |                |                         |                           |
|-------------------------|------|-----------|----------|----------------------------------------------------------------------------------------------------------------------------------------------------------------------------------------------|----------------------------------|-------------------------------------|------------------------------------|----------------------------|-------------------------|----------------|-------------------------|---------------------------|
|                         |      |           |          |                                                                                                                                                                                              |                                  | Interactions - Knowledge Sources    | Interactions - Community Knowledge | Visualisation Improvements | Anthropogenic Processes | Spatial Extent | Users of Visualisations | Completed Network Diagram |
| Academia                | A1   | X         |          | Introductions in Guatemala.                                                                                                                                                                  | 4/5                              | X                                   | X                                  | X                          | X                       |                | X                       | X                         |
|                         | A2   | X         |          |                                                                                                                                                                                              | 1                                | X                                   | X                                  | X                          | X                       |                | X                       | X                         |
| Private Sector          | B1   | X         |          | Online profiles, existing networks and introductions in Guatemala.                                                                                                                           | 5                                | X                                   | X                                  |                            | X                       |                |                         |                           |
|                         | B2   | X         |          |                                                                                                                                                                                              | 2                                | X                                   |                                    |                            | X                       |                |                         |                           |
|                         | B3   | X         |          |                                                                                                                                                                                              | 5                                | X                                   | X                                  | X                          | X                       | X              | X                       | X                         |
| CONRED                  | C1   | X         |          | Identified using guidance from a CONRED host. Our primary selection criteria was diversity of departments and professions (mitigation, monitoring, early-warning, recovery, reconstruction). | 5                                |                                     | X                                  | X                          | X                       |                |                         |                           |
|                         | C2   | X         |          |                                                                                                                                                                                              | 5                                |                                     |                                    |                            | X                       |                | X                       |                           |
|                         | C3   | X         | X        |                                                                                                                                                                                              | 1/5                              | X                                   | X                                  |                            |                         |                |                         | X                         |
|                         | C4   | X         |          |                                                                                                                                                                                              | 3                                |                                     | X                                  | X                          | X                       | X              | X                       |                           |
|                         | C5   | X         |          |                                                                                                                                                                                              | 1                                | X                                   | X                                  | X                          | X                       |                | X                       | X                         |
|                         | C6   | X         | X        |                                                                                                                                                                                              | 1                                |                                     |                                    |                            |                         |                |                         | X                         |
|                         | C7   | X         | X        |                                                                                                                                                                                              | 4/5                              | X                                   | X                                  | X                          | X                       |                | X                       | X                         |
|                         | C8a  | X         |          |                                                                                                                                                                                              | 5                                |                                     |                                    |                            |                         |                |                         |                           |
|                         | C8b  | X         |          |                                                                                                                                                                                              | 3                                |                                     | X                                  |                            |                         |                |                         |                           |
|                         | C9   |           | X        |                                                                                                                                                                                              | 1                                |                                     |                                    |                            |                         |                |                         |                           |
|                         | C10  | X         | X        |                                                                                                                                                                                              | 3                                | X                                   | X                                  | X                          | X                       | X              | X                       | X                         |
|                         | C11  |           | X        |                                                                                                                                                                                              | 1                                |                                     |                                    |                            |                         |                |                         |                           |
|                         | C12  |           | X        |                                                                                                                                                                                              | 1                                |                                     |                                    |                            |                         |                |                         |                           |
|                         | C13  |           | X        |                                                                                                                                                                                              | 1                                |                                     |                                    |                            |                         |                |                         |                           |
|                         | C14  |           | X        |                                                                                                                                                                                              | 1                                |                                     |                                    |                            |                         |                |                         |                           |
|                         | C15  |           | X        |                                                                                                                                                                                              | 1                                |                                     |                                    |                            |                         |                |                         |                           |
|                         | C16  |           | X        |                                                                                                                                                                                              | 1                                |                                     |                                    |                            |                         |                |                         |                           |
|                         | C17  |           | X        |                                                                                                                                                                                              | 1                                |                                     |                                    |                            |                         |                |                         |                           |
|                         | C18  |           | X        |                                                                                                                                                                                              | 1                                |                                     |                                    |                            |                         |                |                         |                           |
|                         | C19  |           | X        |                                                                                                                                                                                              | 1                                |                                     |                                    |                            |                         |                |                         |                           |
|                         | C20  |           | X        |                                                                                                                                                                                              | 1                                |                                     |                                    |                            |                         |                |                         |                           |
| C21                     |      | X         | 1        |                                                                                                                                                                                              |                                  |                                     |                                    |                            |                         |                |                         |                           |
| INSIVUMEH               | D1   | X         |          | Identified using guidance from an INSIVUMEH host, prioritising diverse views (geophysical, meteorology and hydrology).                                                                       | 4/5                              | X                                   | X                                  | X                          | X                       | X              | X                       | X                         |
|                         | D2   | X         |          |                                                                                                                                                                                              | 5                                |                                     | X                                  |                            |                         |                |                         |                           |
|                         | D3   | X         |          |                                                                                                                                                                                              | 1                                | X                                   | X                                  | X                          | X                       | X              | X                       | X                         |
|                         | D4   | X         |          |                                                                                                                                                                                              | 4/5                              | X                                   | X                                  |                            | X                       |                |                         | X                         |
|                         | D5   | X         |          |                                                                                                                                                                                              | 4/5                              | X                                   | X                                  | X                          | X                       |                | X                       | X                         |
|                         | D6   | X         |          |                                                                                                                                                                                              | 4                                | X                                   | X                                  | X                          | X                       |                | X                       | X                         |

<sup>1</sup> C2/C4 interviewed together, with C2 helping as a translator. C2 also gave an opinion on some questions.

<sup>2</sup> C6 was interviewed during a field-trip, with questions mostly directed at observations made in the field.

<sup>3</sup> C8a acted as a translator during an interview with C8b, giving some personal opinions on some questions.

**Table S4. Interviewee comments on natural hazards, hazard interactions and anthropogenic processes in Guatemala.** A summary of comments made in 19 semi-structured interviews that related to natural hazards, hazard interactions and anthropogenic processes in Guatemala. We use participant codes, introduced in [Table S3](#).

| Code | Interview Discussion                                                                                                                                                                                                                                                                                                                                                                                                                                                                                                                                                                                                                                                                                                                                                                                                                                                                                                                                                                                                                                    |                                                                                                                                                                                                                                                                                                                                                                                                              |
|------|---------------------------------------------------------------------------------------------------------------------------------------------------------------------------------------------------------------------------------------------------------------------------------------------------------------------------------------------------------------------------------------------------------------------------------------------------------------------------------------------------------------------------------------------------------------------------------------------------------------------------------------------------------------------------------------------------------------------------------------------------------------------------------------------------------------------------------------------------------------------------------------------------------------------------------------------------------------------------------------------------------------------------------------------------------|--------------------------------------------------------------------------------------------------------------------------------------------------------------------------------------------------------------------------------------------------------------------------------------------------------------------------------------------------------------------------------------------------------------|
|      | Natural Hazards and Interactions                                                                                                                                                                                                                                                                                                                                                                                                                                                                                                                                                                                                                                                                                                                                                                                                                                                                                                                                                                                                                        | Anthropogenic Processes                                                                                                                                                                                                                                                                                                                                                                                      |
| A1   | <ul style="list-style-type: none"> <li>• Most common hazards are hydro-meteorological.</li> <li>• Distinct topography of Guatemala Pacific coastline means that it may not be possible for submarine landslides to occur.</li> <li>• Tsunamis on Pacific coast occur but are small. Highest risk is in the Gulf of Honduras where the Motagua fault goes into the Caribbean.</li> <li>• 2012 earthquake caused liquefaction on the Pacific coast.</li> <li>• Floods are a function of storms/rain.</li> <li>• Storms trigger landslides and lahars.</li> <li>• Earthquakes trigger landslides.</li> <li>• 1976 <math>M_w = 7.5</math> earthquake was associated with both vertical and horizontal displacement.</li> <li>• Earthquakes can trigger aftershocks and transfer stress on to other faults.</li> <li>• Landslides blocked rivers during the 1976 <math>M_w = 7.5</math> earthquake and Hurricane Mitch (1997–98).</li> <li>• Information to relate earthquakes to volcanic eruptions, through the process of transferring stress.</li> </ul> | <ul style="list-style-type: none"> <li>• Urbanisation</li> </ul>                                                                                                                                                                                                                                                                                                                                             |
| A2   | <ul style="list-style-type: none"> <li>• Earthquakes trigger volcanic eruptions and volcanic eruptions trigger earthquakes.</li> <li>• Earthquakes can transfer stress on to other faults.</li> <li>• Main earthquake zones relate to volcanic activity, subduction zones and transform faults.</li> <li>• Hurricanes and rain trigger lahars.</li> <li>• Natural examples of sinkholes in karst region of Coban/Petén.</li> <li>• Heatwaves mainly occur in the lowlands.</li> <li>• Wind and lightning occur.</li> <li>• Liquefaction occurred in 1976 and in 2012 associated with earthquakes.</li> </ul>                                                                                                                                                                                                                                                                                                                                                                                                                                            | <ul style="list-style-type: none"> <li>• Artificial fills; hillslope development.</li> <li>• Possible subsidence (20 cm) due to groundwater abstraction.</li> <li>• Forest fires commonly have human origin.</li> </ul>                                                                                                                                                                                      |
| B1   | <ul style="list-style-type: none"> <li>• One example of a landslide triggering a small (2 m) tsunami in Lake Atitlán, resulting in flooding.</li> <li>• Sedimentation in rivers can result in flooding.</li> <li>• Flooding in one basin can trigger flooding in another basin.</li> <li>• Lots of hazards related to weather patterns.</li> <li>• The source of flooding can be 13 km away from where the flooding occurs. Landslides in the highlands carry sediment to lowlands and have an impact.</li> </ul>                                                                                                                                                                                                                                                                                                                                                                                                                                                                                                                                       | <ul style="list-style-type: none"> <li>• Industry impacts flood patterns through river straightening programmes.</li> <li>• Sinkholes are a function of drainage systems.</li> <li>• Landslides a function of slope modifications, poor building practices (in the highlands) and modification of river beds in the lowlands.</li> <li>• Many landslides are human triggered around Lake Atitlán.</li> </ul> |
| B2   | <ul style="list-style-type: none"> <li>• Hazards include rain, landslides, earthquakes, flooding.</li> <li>• Both 1976 earthquake and Hurricane Mitch (1997–98) triggered approximately 10,000 landslides.</li> <li>• Erosion and sedimentation problems are dynamic, including both anthropogenic processes and natural sediment from volcanoes.</li> </ul>                                                                                                                                                                                                                                                                                                                                                                                                                                                                                                                                                                                                                                                                                            | <ul style="list-style-type: none"> <li>• Landslides problems include human activity, corruption, poor road cuttings and bridges not being built according to regulations.</li> <li>• Deforestation around Panabaj (Solola) resulted in erosion and sedimentation in rivers.</li> </ul>                                                                                                                       |

| Code            | Interview Discussion                                                                                                                                                                                                                                                                                                                                                                                                                                                                                                                                                                                                                                                                                                                                                                                                                                                                                                                                                                                                                                                                                                                                                        |                                                                                                                                                                                                                                |
|-----------------|-----------------------------------------------------------------------------------------------------------------------------------------------------------------------------------------------------------------------------------------------------------------------------------------------------------------------------------------------------------------------------------------------------------------------------------------------------------------------------------------------------------------------------------------------------------------------------------------------------------------------------------------------------------------------------------------------------------------------------------------------------------------------------------------------------------------------------------------------------------------------------------------------------------------------------------------------------------------------------------------------------------------------------------------------------------------------------------------------------------------------------------------------------------------------------|--------------------------------------------------------------------------------------------------------------------------------------------------------------------------------------------------------------------------------|
|                 | Natural Hazards and Interactions                                                                                                                                                                                                                                                                                                                                                                                                                                                                                                                                                                                                                                                                                                                                                                                                                                                                                                                                                                                                                                                                                                                                            | Anthropogenic Processes                                                                                                                                                                                                        |
| B3              | <ul style="list-style-type: none"> <li>• Landslides occur on steep slopes of Guatemala City.</li> <li>• Main groups of hazards are ‘wet’, including floods, landslides, and subsidence. Rainfall is the start of these chains.</li> <li>• Normal rain can trigger localised flooding, landslides and other small events. The sum of these may be the same as larger, extreme weather events in the Caribbean and Pacific.</li> <li>• Landslides can occur in clusters of 2–3 catastrophic landslides or thousands of smaller landslides.</li> <li>• Few examples of landslide dams</li> <li>• Flooding can trigger health hazards.</li> <li>• Lahars have a serious impact on the Samalá river.</li> <li>• When river deltas are full of sediment they are blocked and therefore the deltas grow backwards, resulting in flooding.</li> <li>• Guatemala is not affected by tsunamis.</li> <li>• Earthquakes trigger landslides.</li> <li>• No clear relationship between forest fires and debris flows in Guatemala. Biggest areas affected by forest fires are in Petén (low-relief). Grass grows quickly between fires and rainy season, preventing mud flows.</li> </ul> | <ul style="list-style-type: none"> <li>• Poorly cut slopes</li> <li>• No drainage (water and sewage entering the system).</li> <li>• No technical training for slope treatment.</li> <li>• High density of housing.</li> </ul> |
| C1              | <ul style="list-style-type: none"> <li>• Hazards include flooding, landslides and volcanic eruptions.</li> <li>• Eruptive phases of Santiaguito can result in problems in the Samalá watershed, with sedimentation.</li> <li>• Rain triggered landslides is most recurrent interactions. Landslides can also be triggered by earthquakes if they are large.</li> <li>• In volcanic areas there are interactions such as mudslides and lahars. At Fuego, sediment enters the watershed close by, and then has an impact further from the volcano.</li> <li>• Mixco (Guatemala City) had a slow onset landslide, which then had displacement of over 2 m at once</li> </ul>                                                                                                                                                                                                                                                                                                                                                                                                                                                                                                   | <ul style="list-style-type: none"> <li>• Informal settlements.</li> <li>• Industry modification of watershed.</li> <li>• Building licenses for flood plains.</li> </ul>                                                        |
| C3              | <ul style="list-style-type: none"> <li>• Relevant interactions include pyroclastic flows, and El Niño and La Niña.</li> <li>• The relationship between flooding and geotechnical hazards is important.</li> <li>• Drought and extreme high temperatures (with lightning) can trigger wildfires. These are common in the country.</li> <li>• The border with Honduras acts as a natural barrier to hurricanes, only one hurricane (Hattie) has impacted Guatemala, in 1961. This caused flooding.</li> </ul>                                                                                                                                                                                                                                                                                                                                                                                                                                                                                                                                                                                                                                                                 |                                                                                                                                                                                                                                |
| C4<br>&<br>(C2) | <ul style="list-style-type: none"> <li>• <i>In some regions, floods occur about every two years.</i></li> <li>• Key events generally occur if there is heavy rain at Fuego. This triggers lahars, with sediment coming down and impacting infrastructure. Lahars trigger floods, on the plains away from Fuego. Floods can occur 120 to 140 km away from Fuego.</li> <li>• At Santiaguito, lahars also occur, but their impact is closer to the volcano. Generally, there is one lahar a day at Santiaguito, depending on the rain.</li> <li>• Landslides occur, not always triggered by rain/earthquakes.</li> <li>• Droughts can result in forest fires. It is not that common to have forest fires increase the likelihood of landslides.</li> </ul>                                                                                                                                                                                                                                                                                                                                                                                                                     | <ul style="list-style-type: none"> <li>• <i>Sugar-cane industry is changing the dynamics of the watershed.</i></li> <li>• Landslides are triggered by deforestation, poor road cuttings and people working.</li> </ul>         |
| C5              | <ul style="list-style-type: none"> <li>• Hazards include floods, droughts, forest fires, cold seasons, earthquakes and landslides.</li> <li>• Landslides are rain triggered, but also by conditions such as soil and dryness.</li> <li>• Cold weather can lead to droughts, resulting in vegetation loss.</li> </ul>                                                                                                                                                                                                                                                                                                                                                                                                                                                                                                                                                                                                                                                                                                                                                                                                                                                        | <ul style="list-style-type: none"> <li>• Poor road construction.</li> <li>• Forestation adds fuel for forest fires.</li> </ul>                                                                                                 |
| C6              | <ul style="list-style-type: none"> <li>• Strong impact of ash at Fuego.</li> </ul>                                                                                                                                                                                                                                                                                                                                                                                                                                                                                                                                                                                                                                                                                                                                                                                                                                                                                                                                                                                                                                                                                          |                                                                                                                                                                                                                                |
| C7              | <ul style="list-style-type: none"> <li>• Hazards include earthquakes and hydro-meteorological events.</li> <li>• Four active volcanoes, also affected by rain, floods and landslides.</li> </ul>                                                                                                                                                                                                                                                                                                                                                                                                                                                                                                                                                                                                                                                                                                                                                                                                                                                                                                                                                                            | <ul style="list-style-type: none"> <li>• Conflict.</li> <li>• Poor mine management.</li> </ul>                                                                                                                                 |



| Code        | Interview Discussion                                                                                                                                                                                                                                                                                                                                                                                                                                                                                                                                                                                                                                                                                                                                                                                                                                                                                                                                                                            |                                                                                                                                                                                                                                                                           |
|-------------|-------------------------------------------------------------------------------------------------------------------------------------------------------------------------------------------------------------------------------------------------------------------------------------------------------------------------------------------------------------------------------------------------------------------------------------------------------------------------------------------------------------------------------------------------------------------------------------------------------------------------------------------------------------------------------------------------------------------------------------------------------------------------------------------------------------------------------------------------------------------------------------------------------------------------------------------------------------------------------------------------|---------------------------------------------------------------------------------------------------------------------------------------------------------------------------------------------------------------------------------------------------------------------------|
|             | Natural Hazards and Interactions                                                                                                                                                                                                                                                                                                                                                                                                                                                                                                                                                                                                                                                                                                                                                                                                                                                                                                                                                                | Anthropogenic Processes                                                                                                                                                                                                                                                   |
| C8b & (C8a) | <ul style="list-style-type: none"> <li>• Rainfall close to Santiaguito can result in lahars and flooding. The same event also occurs close to Fuego.</li> <li>• If there is a high tide and a rainy season, rivers do not go out to sea and there is coastal flooding. It floods 'backwards'.</li> <li>• Earthquakes can trigger landslides.</li> <li>• Tsunamis are not very big.</li> <li>• Ash alters meteorological atmosphere, changing the intensity of rain.</li> <li>• At Fuego, hazards include ash.</li> <li>• At Pacaya, there is seismicity associated with eruptions.</li> <li>• Forest fires occur after eruptions as do lahars/pyroclastic flows.</li> </ul>                                                                                                                                                                                                                                                                                                                     |                                                                                                                                                                                                                                                                           |
| C10         | <ul style="list-style-type: none"> <li>• Assessments for sinkholes, landslides, floods, volcanic eruptions and earthquakes as these are the main types of risk.</li> <li>• <i>North of Guatemala</i>: There is a karst area with sinkholes, floods and liquefaction.</li> <li>• <i>Middle Metamorphosed Zone</i>: Landslides</li> <li>• <i>Volcanics Zone</i>: landslides, lahars and eruptions. This is the biggest landslide risk, and closest to the faults.</li> <li>• <i>Coast</i>: Floods occur.</li> <li>• Most important interactions are those between storms and landslides/flooding.</li> <li>• During Tropical Storm Agatha, at Pacaya, there were mudflows, landslides, sinkholes and floods.</li> <li>• The Rio Chixoy and Los Chorros landslide blocked rivers and caused a dam. This resulted in a water rise of 14.8 m. This is the largest example of dam. Rivers are fast and dynamic and it only takes a few days for the material to erode and the dam removed.</li> </ul> | <ul style="list-style-type: none"> <li>• Hydroelectric dams result in flooding.</li> <li>• Floods relate to food production.</li> <li>• In some areas flooding results in snake bites.</li> <li>• Sanitation and pesticides result in contamination of rivers.</li> </ul> |
| D1          | <ul style="list-style-type: none"> <li>• Earthquakes are relevant hazard.</li> <li>• No historical records of tsunamis in Guatemala. The water between the coast and trench is too shallow to trigger tsunamis. Most earthquakes occur between the coast and the trench.</li> <li>• Liquefaction can occur, and photographs were seen of liquefaction on the Pacific coast. Liquefaction also occurred close to Lake Amatitlán during the 1976 earthquake.</li> <li>• Unsure whether earthquakes have triggered subsidence.</li> <li>• Earthquakes trigger landslides.</li> <li>• Not enough events to confirm if there is a correlation between volcanic eruptions and earthquakes. More evidence of large earthquakes causing volcanic eruptions than volcanic eruptions causing large earthquakes.</li> <li>• Landslides can block rivers but they are cleared quickly by the flow of water. Landslide dams are therefore rare.</li> </ul>                                                   | <ul style="list-style-type: none"> <li>• Industrial changes to watersheds.</li> <li>• Deforestation.</li> <li>• Fires (agriculture/fields).</li> </ul>                                                                                                                    |
| D2          | <ul style="list-style-type: none"> <li>• Annually there are hydro-meteorological phenomena.</li> <li>• New phenomena also occur, including droughts, El Niño and La Niña events, and famine.</li> <li>• Volcanic eruptions occur every 10 years, big earthquakes occur every 30 years, big flooding and landslides approximately every 5 years.</li> </ul>                                                                                                                                                                                                                                                                                                                                                                                                                                                                                                                                                                                                                                      |                                                                                                                                                                                                                                                                           |

| Code | Interview Discussion                                                                                                                                                                                                                                                                                                                                                                                                                                                                                                                                                                                                                                                                                                                                                                                                                                                                                                                                                                                                                                                                                                                                                                                                                                                                                                                                                                                                                                                                                         |                                                                                                                                             |
|------|--------------------------------------------------------------------------------------------------------------------------------------------------------------------------------------------------------------------------------------------------------------------------------------------------------------------------------------------------------------------------------------------------------------------------------------------------------------------------------------------------------------------------------------------------------------------------------------------------------------------------------------------------------------------------------------------------------------------------------------------------------------------------------------------------------------------------------------------------------------------------------------------------------------------------------------------------------------------------------------------------------------------------------------------------------------------------------------------------------------------------------------------------------------------------------------------------------------------------------------------------------------------------------------------------------------------------------------------------------------------------------------------------------------------------------------------------------------------------------------------------------------|---------------------------------------------------------------------------------------------------------------------------------------------|
|      | Natural Hazards and Interactions                                                                                                                                                                                                                                                                                                                                                                                                                                                                                                                                                                                                                                                                                                                                                                                                                                                                                                                                                                                                                                                                                                                                                                                                                                                                                                                                                                                                                                                                             | Anthropogenic Processes                                                                                                                     |
| D3   | <ul style="list-style-type: none"> <li>• Typical secondary hazards around volcanoes include lahars at Santiaguito and Fuego. At Santiaguito rainfall of 50–60 mm/hour can trigger a lahar. At Fuego rainfall of 60 mm/hour can trigger a lahar.</li> <li>• <i>Pacaya</i>: It is not normal to have lahars at Pacaya, although one did occur prior to 2000. There is a growing problem with erosion at Pacaya, so this may change. Associated with ash deposits.</li> <li>• <i>Fuego</i>: Erupts with explosions, and with ‘boiling over’ where lava flows and pyroclastic flows. Pyroclastic flows can run 6 to 8 km. Material moves into barrancas [valleys]. Acid rain may also occur. Lahars generate from these flows, which cause floods near to Fuego and 20–25 km away from the site. Little evidence of these lahars blocking rivers as they have too much force.</li> <li>• <i>Santiaguito</i>: Ashfall occurs on a daily basis. There is also a problem with lahars, which travel as far as 60 km to the sea and have the same effect on flooding as those near Fuego. There are some phreatic eruptions, with interactions between water and magma (in relation to deep groundwater, not rainfall).</li> <li>• All three areas have issues of wildfires. There is also lightning at Fuego and Pacaya.</li> <li>• Triggers of eruptions may include earthquakes, this is uncertain and currently being investigated.</li> </ul>                                                                    | <ul style="list-style-type: none"> <li>• Deforestation</li> </ul>                                                                           |
| D4   | <ul style="list-style-type: none"> <li>• Main frost events take place in November to February, affecting 20% of the country. In the Highlands, temperatures vary from 0–13 °C meaning there are higher levels of frost above 1800 m altitude. Frosts normally last 1 to 2 hours, but it can be up to 10 hours.</li> <li>• Along the Pacific coast there is an artificial channel, which many rivers run into. Sediment from the volcanic belt enters this and floods occur at the end of the rivers near the Pacific Ocean.</li> <li>• Flooding in the Pacific is short duration, high energy and induced by volcanic sediments.</li> <li>• Gulf of Mexico is very flat, and flooding can have a long duration (3 months). Rocks are impermeable limestone with caverns and karstic soils. The water table is close to the surface.</li> <li>• Polochic Basin, near Lake Izabal is associated with liquefaction and soil saturation. There are also landslides and rockfalls.</li> <li>• There are few examples of landslide dams in Guatemala, perhaps 2–3 cases after an earthquake occurs. The Rio Chixoy was blocked by a large landslide in 2002.</li> <li>• Around the Polochic Basin there are expansive soils/clays, at the end of the basin. In volcanic soils there are some valleys with expansive soils also. Near the Chixoy and La Pasion Rivers there are some montmorillonite soils.</li> <li>• It is possible that earthquakes may intersect rivers, but no examples were known.</li> </ul> | <ul style="list-style-type: none"> <li>• Heavy soil use.</li> <li>• Mining contamination.</li> <li>• Sewage contamination.</li> </ul>       |
| D5   | <ul style="list-style-type: none"> <li>• Most important area for storms is the Atlantic, but they also come in across the Pacific.</li> <li>• Many landslides occur close to Atitlán and Amatitlán.</li> <li>• The principal cause of landslides is rain. They are worse in the rainfall is after dry weather. Hurricane Mitch came after a dry year. As the cover soil was dry this resulted in lots of problems.</li> <li>• Tornadoes are not common, there was possibly one in Guatemala City in 2012 but it did not cause too much damage.</li> <li>• Hailstorms normally occur in May to October (rainy season). Snowstorms are rare, but have occurred.</li> <li>• Lightning is very problematic in Guatemala.</li> <li>• Wind extends forest fires, as does the lack of rain.</li> <li>• It is possible that volcanic eruptions trigger storms, that particles in the atmosphere resulted in rain.</li> </ul>                                                                                                                                                                                                                                                                                                                                                                                                                                                                                                                                                                                         | <ul style="list-style-type: none"> <li>• Drainage maintenance impacts sinkholes.</li> <li>• Fires are often triggered by humans.</li> </ul> |

| Code | Interview Discussion                                                                                                                                                                                                                                                                                                                                                                                                                                                                                                                                                                                                                                                                                                                                                                                                                                                                                                                                                                                                                                                                                                                          |                                                                                                                    |
|------|-----------------------------------------------------------------------------------------------------------------------------------------------------------------------------------------------------------------------------------------------------------------------------------------------------------------------------------------------------------------------------------------------------------------------------------------------------------------------------------------------------------------------------------------------------------------------------------------------------------------------------------------------------------------------------------------------------------------------------------------------------------------------------------------------------------------------------------------------------------------------------------------------------------------------------------------------------------------------------------------------------------------------------------------------------------------------------------------------------------------------------------------------|--------------------------------------------------------------------------------------------------------------------|
|      | Natural Hazards and Interactions                                                                                                                                                                                                                                                                                                                                                                                                                                                                                                                                                                                                                                                                                                                                                                                                                                                                                                                                                                                                                                                                                                              | Anthropogenic Processes                                                                                            |
| D6   | <ul style="list-style-type: none"> <li>• Every year there are landslides and floods, normally occurring in the same places.</li> <li>• Floods occur in volcanic areas close to the Pacific coast and close to the Caribbean coast near to Lake Izabal. Precipitation is very strong in July to October. Floods are generated by fast movement down volcanic chains and in rivers. There are lahars on volcanoes and lots of sediment in the basin.</li> <li>• Other key hazards are landslides, sinkholes, seismic hazards, mudflows and volcanic hazards.</li> <li>• Tsunamis are possible but rare. There has been one in the past 100 years in the Pacific. In the Atlantic they have had two in the past 100 years. They generally have little impact.</li> <li>• During the 1976 and 2009 earthquakes, there was liquefaction and flooding.</li> <li>• Lahars result in erosion and flooding, with Santiaguito cited as an example.</li> <li>• There are also clay palaeosols which shrink and swell when there are droughts and no droughts. These can result in small landslides.</li> <li>• Hail can result in landslides.</li> </ul> | <ul style="list-style-type: none"> <li>• Large (sugar and coffee) farms build levees and divert rivers.</li> </ul> |



**Table S5. Evidence used to populate each cell within the national interaction framework presented in Figure 3.** Information is presented (mechanism) which describes the physical process by which primary hazards (relevant to Guatemala) trigger, or increases the probability, of secondary hazards (relevant to Guatemala). We note evidence sources used to evidence each interaction, described in detail in Section 2.

| Primary Hazard    | Secondary Hazard                | Grid ID | Generic Mechanism Description                                                                                                                | Evidence                                                                                                                                                     |
|-------------------|---------------------------------|---------|----------------------------------------------------------------------------------------------------------------------------------------------|--------------------------------------------------------------------------------------------------------------------------------------------------------------|
|                   |                                 |         |                                                                                                                                              | A = International Literature<br>B = Civil Protection Bulletins<br>C = Field Observations<br>D = Stakeholder Interviews<br>E = Workshop ( $\geq 50\%$ people) |
| Earthquake        | Earthquake                      | 1A      | A primary earthquake causes changes in lithospheric stresses, leading to aftershocks as the lithosphere responds to these changes.           | A, D                                                                                                                                                         |
|                   | Tsunami                         | 1B      | A rupturing fault line causes the displacement of a large amount of water, triggering a tsunami.                                             | A, D, E                                                                                                                                                      |
|                   | Volcanic Eruption               | 1C      | Changes in lithospheric stress either (i) reduces confining pressure or (ii) increases pressure within the magma chamber.                    | D                                                                                                                                                            |
|                   | Landslide                       | 1D      | Seismic shaking results in changes in shear stresses and strength causing the movement of rock and soil material under gravitational forces. | A, D, E                                                                                                                                                      |
|                   | Regional Subsidence             | 1H      | Vertical displacement caused by faulting results in subsidence on a regional scale.                                                          | A, D                                                                                                                                                         |
|                   | Ground Collapse                 | 1I      | Liquefaction can result in compression of soils and rapid downwards movement.                                                                | A, D, E                                                                                                                                                      |
|                   | Ground Heave                    | 1K      | Liquefaction can result in dilation of soils and upwards expansion.                                                                          | E                                                                                                                                                            |
| Tsunami           | Flood                           | 2F      | A tsunami will trigger coastal or lakeshore flooding and possible fluvial flooding through increased groundwater and surface run off.        | A, E                                                                                                                                                         |
| Volcanic Eruption | Earthquake                      | 3A      | Injections of magma result in changes in lithospheric stresses, triggering volcano-tectonic earthquakes.                                     | A, D, E                                                                                                                                                      |
|                   | Tsunami                         | 3B      | Tsunamis can be as a result of large volcanic explosions close to lakes.                                                                     | A                                                                                                                                                            |
|                   | Landslide                       | 3D      | Volcanic activity can either (i) increase shear stress or (ii) decrease shear strength, resulting in landslides (flank instability).         | A, B, C, E                                                                                                                                                   |
|                   | Flood                           | 3F      | Lava, ash and pyroclastic material can (i) dam waterways, (ii) block drainage, (iii) melt snow/ice, and thus result in flooding.             | A, D                                                                                                                                                         |
|                   | Lightning                       | 3P      | The collision of ash particles can result in electric discharge in the form of lightning.                                                    | D                                                                                                                                                            |
|                   | Extreme Temperature (Heat/Cold) | 3R/Q    | The ejection of sulphur into the stratosphere can result in both net heating and net cooling.                                                | A [if very large eruption]                                                                                                                                   |
|                   | Wildfire                        | 3S      | High temperature lava, ash and pyroclastic material can directly trigger wildfires when it comes in contact with flammable material.         | D                                                                                                                                                            |
| Landslide         | Tsunami                         | 4B      | Landslides impacting upon or within water result in the displacement of water, thus                                                          | A, C, D                                                                                                                                                      |

| Primary Hazard          | Secondary Hazard        | Grid ID | Generic Mechanism Description                                                                                                                                                                                                                                                               | Evidence                                                                                                                                                     |
|-------------------------|-------------------------|---------|---------------------------------------------------------------------------------------------------------------------------------------------------------------------------------------------------------------------------------------------------------------------------------------------|--------------------------------------------------------------------------------------------------------------------------------------------------------------|
|                         |                         |         |                                                                                                                                                                                                                                                                                             | A = International Literature<br>B = Civil Protection Bulletins<br>C = Field Observations<br>D = Stakeholder Interviews<br>E = Workshop ( $\geq 50\%$ people) |
|                         |                         |         | triggering a tsunami. These landslides can be either subaerial or submarine.                                                                                                                                                                                                                |                                                                                                                                                              |
|                         | Volcanic Eruption       | 4C      | Unloading of a volcano by landslides and flank collapse reduces confining pressures, changing lithospheric stress and strength conditions. Material input into lava may trigger the nucleation of bubbles, triggering an eruption.                                                          | A                                                                                                                                                            |
|                         | Landslide               | 4D      | A landslide can result in the mobilisation and deposition of material in another location, increasing the weight on the head of a slope and promoting instability. The mobilisation of sediment by landslides can also increase the likelihood of debris flows in the event of a rainstorm. | A, B                                                                                                                                                         |
|                         | Flood                   | 4F      | Material from landslides can (i) dam waterways, and (ii) increase sedimentation in rivers, to promote flooding.                                                                                                                                                                             | A, B, C, D                                                                                                                                                   |
| Flood                   | Volcanic Eruption       | 6C      | Water can trigger or increase the probability of hydromagmatic or phreatomagmatic volcanism.                                                                                                                                                                                                | A, D [phreatic, groundwater interactions]                                                                                                                    |
|                         | Landslide               | 6D      | Flood waters can (i) increase groundwater levels and therefore pore water pressures, decreasing effective stress, and (ii) increasing erosion of the slope toe.                                                                                                                             | B                                                                                                                                                            |
|                         | Ground Collapse         | 6I      | Increased water can result in (i) dissolution of salt and carbonate deposits, (ii) hydrocompaction of metastable deposits.                                                                                                                                                                  | B, D                                                                                                                                                         |
|                         | Ground Heave            | 6K      | Increased water results in the swelling of clay minerals.                                                                                                                                                                                                                                   | A                                                                                                                                                            |
| Drought                 | Soil (Local) Subsidence | 7J      | Reduced water results in the shrinking of clay minerals and thus local subsidence.                                                                                                                                                                                                          | A, D                                                                                                                                                         |
|                         | Wildfire                | 7S      | Drought results in dry and dead vegetation which increases the probability of wildfires.                                                                                                                                                                                                    | A, D                                                                                                                                                         |
| Regional Subsidence     | Flood                   | 8F      | Regional subsidence increases vulnerability to flooding.                                                                                                                                                                                                                                    | Not noted in A–E, but if subsidence occurs then an increased susceptibility to flooding is inevitable.                                                       |
| Soil (Local) Subsidence | Landslide               | 10D     | Local/soil subsidence changes the stress conditions within slopes.                                                                                                                                                                                                                          | D                                                                                                                                                            |
| Ground Heave            | Landslide               | 11D     | Ground heave changes the stress conditions within slopes.                                                                                                                                                                                                                                   | D                                                                                                                                                            |
| Storm                   | Tsunami                 | 12B     | Perturbations in air pressure over the ocean can generate large amplitude standing waves.                                                                                                                                                                                                   | A                                                                                                                                                            |
|                         | Volcanic Eruption       | 12C     | Water can trigger or increase the probability of hydromagmatic or phreatomagmatic volcanism, forming small steam explosions or more intense activity.                                                                                                                                       | A, D [phreatic, groundwater interactions]                                                                                                                    |
|                         | Landslide               | 12D     | Rainwater increases groundwater levels and therefore pore water pressures, decreasing effective stress.                                                                                                                                                                                     | A, B, C, D, E                                                                                                                                                |

| Primary Hazard             | Secondary Hazard           | Grid ID | Generic Mechanism Description                                                                                                        | Evidence                                                                                                                                                     |
|----------------------------|----------------------------|---------|--------------------------------------------------------------------------------------------------------------------------------------|--------------------------------------------------------------------------------------------------------------------------------------------------------------|
|                            |                            |         |                                                                                                                                      | A = International Literature<br>B = Civil Protection Bulletins<br>C = Field Observations<br>D = Stakeholder Interviews<br>E = Workshop ( $\geq 50\%$ people) |
|                            | Flood                      | 12F     | Heavy rainfall can increase groundwater and surface water levels - causing flash, fluvial and urban flooding.                        | A, B, C, D, E                                                                                                                                                |
|                            | Ground Collapse            | 12I     | Increased water can result in (i) dissolution of salt and carbonate deposits, (ii) hydrocompaction of metastable deposits.           | A, B, D, E                                                                                                                                                   |
|                            | Ground Heave               | 12K     | Increased water results in swelling of clay minerals.                                                                                | A, D                                                                                                                                                         |
|                            | Tornado                    | 12M     | Tornadoes are produced in hurricanes or tropical storms due to vertical wind shear.                                                  | A, D                                                                                                                                                         |
|                            | Lightning                  | 12P     | The collision of particles can result in electric discharge in the form of lightning.                                                | A, B                                                                                                                                                         |
| Hailstorm                  | Landslide                  | 14D     | Water from hailstorms can increase groundwater levels and therefore pore water pressures, decreasing effective stress.               | D                                                                                                                                                            |
|                            | Lightning                  | 14P     | The collision of ash particles can result in electric discharge in the form of lightning.                                            | A                                                                                                                                                            |
| Lightning                  | Wildfire                   | 16S     | Lightning discharge can spark fires.                                                                                                 | D, E                                                                                                                                                         |
| Extreme Temperature (Hot)  | Drought                    | 17G     | High temperatures result in an increase in evapotranspiration - thus promoting drought conditions.                                   | A, E                                                                                                                                                         |
|                            | Wildfire                   | 17S     | The drying of vegetation by extreme temperatures can result in an increased probability of wildfires.                                | A, D, E                                                                                                                                                      |
| Extreme Temperature (Cold) | Drought                    | 18G     | Extreme cold conditions can lead to a winter drought when precipitation is in solid rather than liquid form.                         | D                                                                                                                                                            |
| Wildfire                   | Landslides                 | 19D     | Wildfires can remove vegetation, wakening slopes and increasing the likelihood of mass movements.                                    | Supported by globally-relevant literature rather than location-specific evidence                                                                             |
|                            | Wildfire                   | 19S     | Spotting from wildfires can trigger further wildfires.                                                                               | A                                                                                                                                                            |
| Impact Event               | Earthquake                 | 21A     | Impact events can cause major lithospheric disturbance, including the release of stress as earthquakes.                              |                                                                                                                                                              |
|                            | Tsunami                    | 21B     | Impact events in water can cause large scale displacement of water, thus triggering a tsunami.                                       | Identified as being generally possible, supported by globally-relevant literature rather than location-specific evidence.                                    |
|                            | Volcanic Eruption          | 21C     | Impact events can cause major lithospheric disturbance, triggering volcanic eruptions.                                               |                                                                                                                                                              |
|                            | Extreme Temperature (Cold) | 21R     | Impact events can cause large-scale injections of dust and other particles into the atmosphere - causing widespread cooling effects. |                                                                                                                                                              |
|                            | Wildfire                   | 21S     | Impact events can cause wildfires as super-heated material touches flammable materials.                                              |                                                                                                                                                              |
